# Supplementary material for: C–H activation and subsequent C–C bond formation in rigid alkenes catalyzed by Ru(iii) metallates
Source: Royal Society of Chemistry journal article supplement (doi:10.1039/d2re00317a), 2022-10-19
Supplement: d2re00317a1.pdf [file d2re00317a1.pdf]

## SUPPORTING INFORMATION

### EXPERIMENTAL SECTION

The reagents employed were of analar grade and the solvents used were purified and dried according to the standard procedure.<sup>S1</sup> Melting points were measured in a RAAGA melting point apparatus. Infrared spectra were measured as KBr pellets on a Jasco FT-IR 400-4000 cm<sup>-1</sup> range. Electronic spectra of the compounds were recorded using JASCO 600 spectrophotometer. <sup>1</sup>H and <sup>13</sup>C NMR spectra were recorded at room temperature with a Bruker 400 MHz instrument, chemical shifts were relative to tetramethylsilane (TMS) and expressed in parts per million (ppm). The metal precursor [Ru(acac)<sub>2</sub>(CH<sub>3</sub>CN)<sub>2</sub>] and the ligands **HL**<sup>1</sup> and **HL**<sup>2</sup> were prepared according to the reported procedure.<sup>S2,S3</sup> Mass spectra were recorded with a Bruker Q-TOF high-resolution mass spectrometer.

### Spectral data of the products

**A1:** <sup>1</sup>H NMR (CDCl<sub>3</sub>, δ ppm): 9.10 (d, *J* = 6.4 Hz, 1H), 8.21 (s, 1H), 8.07 (s, 1H), 7.81 (d, *J* = 5.6 Hz, 2H), 7.71-7.75 (t, *J* = 7.2 Hz, 2H), 7.57-7.63 (m, 5H), 4.88 (s, 1H), 4.70 (d, *J* = 10.4 Hz, 3H), 4.42 (s, 2H), 4.12 (s, 4H), 4.01 (s, 2H), 3.25 (d, *J* = 6.8 Hz, 1H), 3.10-3.14 (t, *J* = 6.8 Hz, 1H), 2.31 (s, 3H). <sup>13</sup>C NMR (CDCl<sub>3</sub>, δ ppm): 190.5, 136.0, 127.8, 127.7, 127.5, 126.2, 125.0, 124.8, 124.6, 124.3, 124.0, 122.0, 85.0, 72.3, 69.8, 69.6, 62.0, 61.4, 29.7. ESI: m/z calcd. for C<sub>34</sub>H<sub>27</sub>NO<sub>2</sub>Fe: 537.4287; Found: 537.1760 [M]<sup>+</sup>.

**A2:** <sup>1</sup>H NMR (CDCl<sub>3</sub>, δ ppm): 9.10 (s, 1H), 8.14 (d, *J* = 48 Hz, 1H), 7.62-7.81 (m, 8H), 4.87 (s, 1H), 4.69-4.76 (t, *J* = 16 Hz, 2H), 4.42 (s, 1H), 4.15 (d, *J* = 20 Hz, 2H), 4.02 (s, 2H), 3.20 (d, *J* = 56 Hz, 1H), 1.47-1.51 (t, *J* = 8 Hz, 3H). <sup>13</sup>C NMR (CDCl<sub>3</sub>, δ ppm): 202.2, 137.3, 128.7, 126.9, 126.8, 125.5, 124.0, 79.2, 72.3, 69.8, 69.6, 53.5, 27.4.

**A3:** <sup>1</sup>H NMR (CDCl<sub>3</sub>, δ ppm): 8.11 (s, 1H), 7.97 (s, 1H), 7.96-7.83 (t, *J* = 7.2 Hz, 1H), 7.63 (d, *J* = 8.4 Hz, 1H), 7.34-7.50 (m, 6H), 4.83 (s, 1H), 4.69 (s, 2H), 4.49 (d, *J* = 6.8 Hz, 1H), 4.42 (s, 1H), 4.13 (s, 2H), 4.01 (s, 2H), 3.08-3.21 (dd, *J* = 8 Hz, 1H), 2.42 (d, *J* = 16 Hz, 3H), 1.17 (s, 3H). <sup>13</sup>C NMR (CDCl<sub>3</sub>, δ ppm): 200.7, 158.0, 142.7, 133.6, 132.1, 129.6, 125.09, 125.03, 123.5, 123.1, 77.7, 70.8, 68.3, 68.1, 60.2, 60.0, 25.9, 19.7.

**A4:**  $^1\text{H}$  NMR ( $\text{CDCl}_3$ ,  $\delta$  ppm): 7.83 (s, 1H), 7.52-7.58 (m, 4H), 7.13 (d,  $J = 8$  Hz, 3H), 4.69 (s, 3H), 4.48-4.53 (q, 2H), 4.43 (s, 1H), 4.13 (s, 1H), 4.01-4.05 (t,  $J = 12$  Hz, 1H), 2.44 (s, 3H), 2.33 (s, 1H), 1.37-1.41 (t,  $J = 8$  Hz, 3H).  $^{13}\text{C}$  NMR ( $\text{CDCl}_3$ ,  $\delta$  ppm): 191.3, 160.1, 146.1, 139.4, 135.4, 127.0, 126.3, 126.1, 123.8, 123.0, 72.3, 69.8, 69.6, 61.8, 61.5, 29.7, 21.7.

**A5:**  $^1\text{H}$  NMR ( $\text{CDCl}_3$ ,  $\delta$  ppm): 8.31 (s, 1H), 8.13 (d,  $J = 8$  Hz, 1H), 7.64 (d,  $J = 8$  Hz, 1H), 7.51-7.56 (m, 2H), 7.34-7.45 (m, 4H), 7.11 (d,  $J = 16$  Hz, 1H), 4.85 (d,  $J = 8$  Hz, 3H), 4.54 (d,  $J = 16$  Hz, 3H), 4.15 (d,  $J = 12$  Hz, 6H), 2.68 (d,  $J = 8$  Hz, 3H), 1.17 (s, 3H).  $^{13}\text{C}$  NMR ( $\text{CDCl}_3$ ,  $\delta$  ppm): 202.1, 139.4, 135.6, 130.4, 127.8, 126.99, 126.91, 126.5, 124.4, 120.4, 79.2, 72.8, 72.3, 70.1, 69.8, 69.6, 62.3, 27.4, 14.8.

**A6:**  $^1\text{H}$  NMR ( $\text{CDCl}_3$ ,  $\delta$  ppm): 8.08 (s, 1H), 7.89 (d,  $J = 8$  Hz, 3H), 7.72-7.77 (t,  $J = 12$  Hz, 1H), 7.67-7.70 (t,  $J = 8$  Hz, 1H), 7.56-7.62 (m, 2H), 7.42-7.48 (m, 3H), 7.34-7.37 (t,  $J = 8$  Hz, 3H), 4.47-4.54 (q, 2H), 4.02 (d,  $J = 12$  Hz, 1H), 1.35-1.39 (t,  $J = 8$  Hz, 3H).  $^{13}\text{C}$  NMR ( $\text{CDCl}_3$ ,  $\delta$  ppm): 198.8, 198.0, 136.9, 136.7, 136.6, 135.6, 135.0, 133.4, 133.1, 130.1, 128.7, 128.6, 128.1, 127.3, 127.1, 126.9, 126.6, 124.2, 124.1, 53.5, 29.72.

**A7:**  $^1\text{H}$  NMR ( $\text{CDCl}_3$ ,  $\delta$  ppm): 8.08 (s, 1H), 7.97 (d,  $J = 8$  Hz, 4H), 7.86 (d,  $J = 8$  Hz, 1H), 7.53-7.57 (m, 3H), 7.49-7.51 (dd,  $J = 8$  Hz, 1H), 7.43-7.47 (t,  $J = 8$  Hz, 4H), 4.45-4.51 (q, 2H), 3.66 (s, 1H), 2.50 (s, 3H), 1.35-1.38 (t,  $J = 8$  Hz, 3H).  $^{13}\text{C}$  NMR ( $\text{CDCl}_3$ ,  $\delta$  ppm): 197.8, 197.5, 149.2, 144.1, 136.8, 136.0, 135.9, 135.6, 132.2, 132.0, 131.6, 131.1, 129.8, 127.6, 127.5, 127.1, 127.0, 126.7, 126.5, 125.39, 125.32, 124.9, 124.1, 60.6, 36.9, 20.5. ESI:  $m/z$  calcd. for  $\text{C}_{27}\text{H}_{23}\text{NO}_2$ : 393.4770; Found: 392.2936  $[\text{M}-\text{H}]^+$ .

**A8:**  $^1\text{H}$  NMR ( $\text{CDCl}_3$ ,  $\delta$  ppm): 8.12 (s, 1H), 7.97 (d,  $J = 8$  Hz, 3H), 7.68 (d,  $J = 8$  Hz, 1H), 7.60 (d,  $J = 8$  Hz, 1H), 7.54-7.58 (t,  $J = 8$  Hz, 3H), 7.51 (d,  $J = 8$  Hz, 1H), 7.43-7.47 (t,  $J = 8$  Hz, 4H), 7.41 (d,  $J = 8$  Hz, 1H), 4.93 (s, 1H), 4.59-4.65 (p, 2H), 2.75 (d,  $J = 8$  Hz, 3H), 1.47-1.50 (t,  $J = 8$  Hz, 3H).  $^{13}\text{C}$  NMR ( $\text{CDCl}_3$ ,  $\delta$  ppm): 197.0, 148.6, 146.9, 145.1, 144.6, 135.5, 135.3, 135.2, 133.5, 132.3, 131.0, 129.2, 129.0, 127.6, 127.1, 126.2, 125.8, 124.4, 124.2, 68.8, 28.6, 16.8, 16.7. ESI:  $m/z$  calcd. for  $\text{C}_{27}\text{H}_{23}\text{NO}_2$ : 393.4770; Found: 392.1630  $[\text{M}-\text{H}]^+$ .

**A9:**  $^1\text{H}$  NMR ( $\text{CDCl}_3$ ,  $\delta$  ppm): 9.04-9.13 (dd,  $J = 8$  Hz, 1H), 7.94 (s, 1H), 7.80-7.82 (t,  $J = 4$  Hz, 1H), 7.74 (s, 1H), 7.55-7.62 (m, 5H), 4.76 (s, 1H), 4.65-4.71 (q, 1H), 1.45-1.49 (t,  $J = 8$  Hz, 2H).  $^{13}\text{C}$  NMR ( $\text{CDCl}_3$ ,  $\delta$  ppm): 197.5, 149.0, 143.9, 137.5, 135.5, 132.5, 132.2, 129.3, 127.6, 127.3,

127.1, 127.0, 126.7, 126.2, 124.5, 123.5, 123.4, 123.3, 61.5, 28.6. ESI: m/z calcd. for  $C_{30}H_{23}NO_2$ : 429.5091; Found: 430.1357  $[M+H]^+$ .

**A10:**  $^1H$  NMR ( $CDCl_3$ ,  $\delta$  ppm): 8.04 (s, 1H), 7.90 (d,  $J = 8$  Hz, 1H), 7.77 (d,  $J = 12$  Hz, 1H), 7.73 (d,  $J = 8$  Hz, 1H), 7.63-7.67 (m, 3H), 7.52-7.57 (dd,  $J = 8$  Hz, 3H), 7.45-7.50 (m, 3H), 7.03-7.05 (t,  $J = 4$  Hz, 1H), 4.71 (s, 1H), 4.50-4.55 (q, 2H), 1.38-1.41 (t,  $J = 8$  Hz, 3H).  $^{13}C$  NMR ( $CDCl_3$ ,  $\delta$  ppm): 196.6, 158.5, 142.6, 135.1, 134.9, 132.7, 132.6, 129.6, 129.3, 127.5, 127.3, 126.7, 126.6, 126.5, 126.2, 125.2, 124.0, 123.8, 123.5, 123.3, 122.9, 120.9, 61.0, 60.4, 28.6.

**A11:**  $^1H$  NMR ( $CDCl_3$ ,  $\delta$  ppm): 8.50 (d,  $J = 8$  Hz, 1H), 7.91 (d,  $J = 8$  Hz, 1H), 7.79-7.82 (t,  $J = 8$  Hz, 2H), 7.72 (s, 1H), 7.52 (d,  $J = 4$  Hz, 1H), 7.43-7.50 (m, 4H), 7.40 (d,  $J = 8$  Hz, 1H), 4.46-4.51 (q, 2H), 3.37 (s, 1H), 2.43 (s, 3H), 1.36-1.40 (t,  $J = 8$  Hz, 3H).  $^{13}C$  NMR ( $CDCl_3$ ,  $\delta$  ppm): 184.9, 147.1, 144.5, 136.2, 134.6, 131.4, 131.1, 126.8, 126.3, 125.4, 61.1, 28.6, 20.5.

**A12:**  $^1H$  NMR ( $CDCl_3$ ,  $\delta$  ppm): 8.64 (s, 1H), 8.13 (s, 1H), 7.93 (s, 1H), 7.80 (d,  $J = 4$  Hz, 2H), 7.76-7.79 (t,  $J = 12$  Hz, 1H), 7.61-7.63 (dd,  $J = 4$  Hz, 1H), 7.58 (d,  $J = 8$  Hz, 2H), 7.40-7.42 (dd,  $J = 8$  Hz, 2H), 7.12-7.17 (m, 2H), 4.55-4.60 (q, 2H), 2.53 (s, 1H), 2.46 (s, 3H), 1.49-1.52 (t,  $J = 8$  Hz, 3H).  $^{13}C$  NMR ( $CDCl_3$ ,  $\delta$  ppm): 181.4, 159.1, 146.0, 144.7, 140.5, 138.7, 138.0, 132.7, 130.7, 128.3, 127.2, 126.6, 125.6, 125.3, 123.3, 121.8, 117.9, 61.2, 20.9, 13.6. ESI: m/z calcd. for  $C_{25}H_{21}NO_2S$ : 399.5047; Found: 397.8281  $[M-2H]^+$ .

**A13:**  $^1H$  NMR ( $CDCl_3$ ,  $\delta$  ppm): 9.05-9.07 (t,  $J = 4$  Hz, 1H), 7.96 (s, 1H), 7.82-7.83 (t,  $J = 4$  Hz, 1H), 7.80 (d,  $J = 4$  Hz, 1H), 7.75-7.78 (m, 1H), 7.65-7.67 (m, 1H), 7.63-7.64 (m, 1H), 7.61 (d,  $J = 4$  Hz, 1H), 7.59 (d,  $J = 4$  Hz, 2H), 7.57 (d,  $J = 4$  Hz, 1H), 7.55-7.56 (m, 1H), 4.77 (s, 1H), 4.66-4.72 (q, 2H), 1.46-1.49 (t,  $J = 8$  Hz, 3H).  $^{13}C$  NMR ( $CDCl_3$ ,  $\delta$  ppm): 183.4, 146.8, 144.3, 134.9, 132.66, 132.62, 131.8, 129.2, 127.4, 127.2, 126.7, 126.2, 124.4, 123.5, 60.9, 28.6.

**A14:**  $^1H$  NMR ( $CDCl_3$ ,  $\delta$  ppm): 8.66 (d,  $J = 8$  Hz, 1H), 7.91 (d,  $J = 8$  Hz, 2H), 7.85 (d,  $J = 8$  Hz, 2H), 7.79 (d,  $J = 8$  Hz, 2H), 7.50-7.54 (dt,  $J = 8$  Hz, 2H), 7.39-7.47 (m, 4H), 4.76 (s, 1H), 4.55-4.61 (q, 2H), 1.43-1.47 (t,  $J = 8$  Hz, 3H).  $^{13}C$  NMR ( $CDCl_3$ ,  $\delta$  ppm): 200.8, 134.4, 132.9, 132.0, 129.1, 127.6, 127.3, 127.0, 125.4, 124.9, 123.2, 60.0, 28.9, 28.6. ESI: m/z calcd. for  $C_{30}H_{23}NO_2$ : 429.5091; Found: 428.4094  $[M-H]^+$ .

**A15:**  $^1\text{H}$  NMR ( $\text{CDCl}_3$ ,  $\delta$  ppm): 8.02 (s, 1H), 7.97 (d,  $J = 4$  Hz, 3H), 7.88 (d,  $J = 8$  Hz, 1H), 7.82 (s, 1H), 7.66 (d,  $J = 8$  Hz, 1H), 7.52-7.58 (m, 4H), 7.42-7.48 (m, 4H), 7.37 (d,  $J = 8$  Hz, 1H), 4.53-4.58 (q, 2H), 2.51 (s, 3H), 2.44 (s, 1H), 1.42-1.46 (t,  $J = 8$  Hz, 3H).  $^{13}\text{C}$  NMR ( $\text{CDCl}_3$ ,  $\delta$  ppm): 161.0, 153.8, 145.8, 143.1, 133.2, 131.3, 131.2, 130.0, 127.3, 125.5, 124.0, 116.9, 115.6, 59.6, 27.3, 19.2. ESI:  $m/z$  calcd. for  $\text{C}_{31}\text{H}_{25}\text{NO}_2$ : 443.5357; Found: 445.1693  $[\text{M}+2\text{H}]^+$ .

**A16:**  $^1\text{H}$  NMR ( $\text{CDCl}_3$ ,  $\delta$  ppm): 8.19 (s, 1H), 7.98 (d,  $J = 8$  Hz, 3H), 7.87 (d,  $J = 8$  Hz, 1H), 7.79 (d,  $J = 8$  Hz, 2H), 7.67-7.71 (t,  $J = 8$  Hz, 3H), 7.63 (d,  $J = 8$  Hz, 2H), 7.53-7.57 (t,  $J = 8$  Hz, 3H), 7.43-7.47 (t,  $J = 8$  Hz, 4H), 4.76 (s, 1H), 4.55-4.60 (q, 2H), 1.44-1.48 (t,  $J = 8$  Hz, 3H).  $^{13}\text{C}$  NMR ( $\text{CDCl}_3$ ,  $\delta$  ppm): 202.3, 147.9, 145.4, 136.1, 135.9, 135.4, 133.9, 133.7, 132.9, 132.8, 130.3, 128.5, 128.4, 128.3, 127.8, 127.2, 126.5, 125.5, 124.6, 124.3, 62.0, 29.7. ESI:  $m/z$  calcd. for  $\text{C}_{34}\text{H}_{25}\text{NO}_2$ : 479.5678; Found: 476.1671  $[\text{M}-3\text{H}]^+$ .

**A17:**  $^1\text{H}$  NMR ( $\text{CDCl}_3$ ,  $\delta$  ppm): 8.06 (s, 1H), 7.97-7.99 (dd,  $J = 8$  Hz, 2H), 7.93 (s, 1H), 7.85 (d,  $J = 20$  Hz, 1H), 7.53-7.57 (t,  $J = 8$  Hz, 3H), 7.41-7.48 (m, 5H), 4.78 (s, 1H), 4.58-4.64 (p, 2H), 2.76 (d,  $J = 8$  Hz, 3H), 2.68 (s, 3H), 1.46-1.50 (q, 3H).

**A18:**  $^1\text{H}$  NMR ( $\text{CDCl}_3$ ,  $\delta$  ppm): 8.30 (d,  $J = 8$  Hz, 1H), 7.94 (d,  $J = 8$  Hz, 1H), 7.86 (s, 2H), 7.71 (d,  $J = 8$  Hz, 2H), 7.47 (s, 2H), 7.41-7.43 (dd,  $J = 8$  Hz, 2H), 4.76 (s, 1H), 4.55-4.60 (q, 2H), 2.48 (s, 3H), 1.44-1.47 (t,  $J = 8$  Hz, 3H).

**A19:**  $^1\text{H}$  NMR ( $\text{CDCl}_3$ ,  $\delta$  ppm): 7.96-8.01 (m, 1H), 7.85-7.88 (t,  $J = 8$  Hz, 2H), 7.71 (d,  $J = 8$  Hz, 1H), 7.59-7.63 (m, 2H), 7.41-7.50 (m, 6H), 7.36 (d,  $J = 8$  Hz, 1H), 4.76 (s, 1H), 4.55-4.60 (q, 2H), 2.48 (s, 3H), 1.53-1.56 (t,  $J = 8$  Hz, 3H).

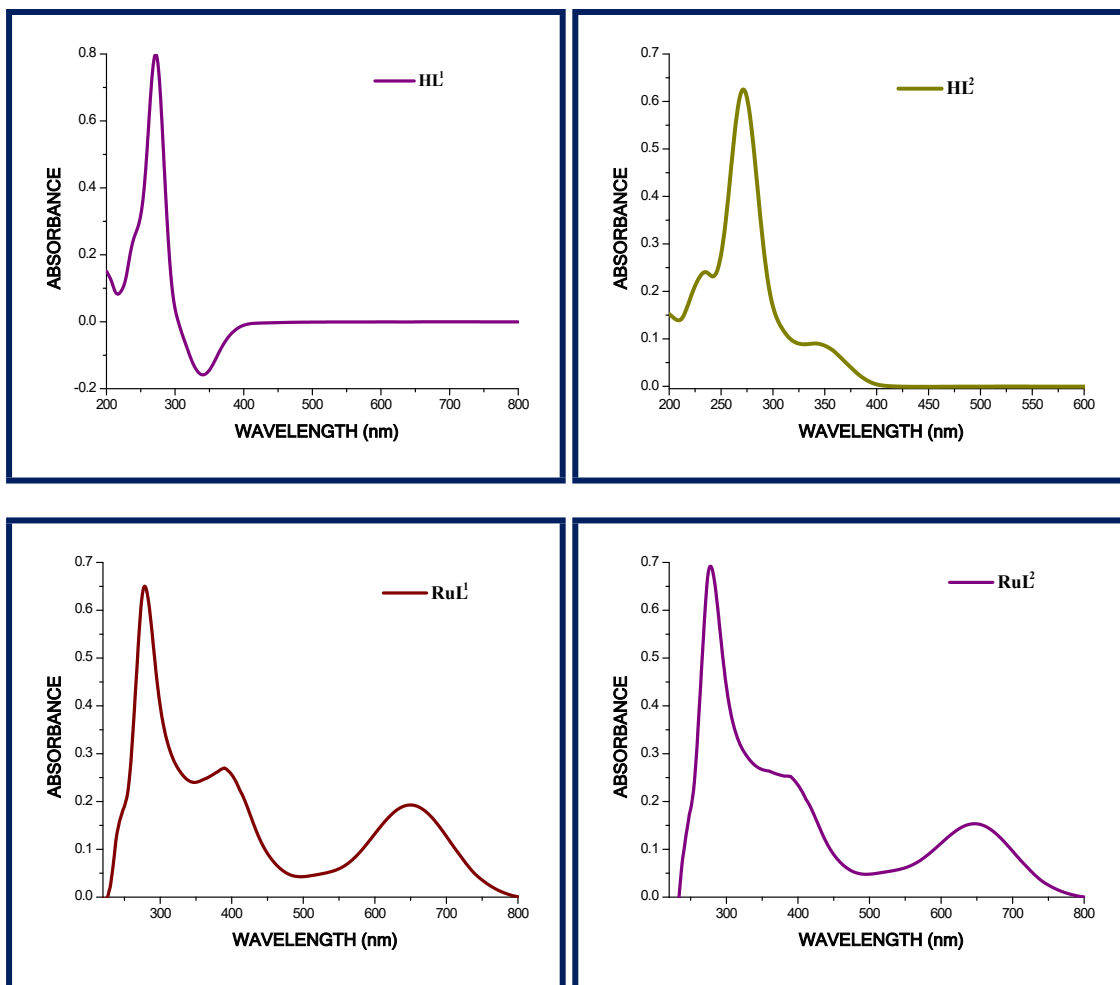

**Fig. S1.** Electronic spectra of the ligands **HL<sup>1</sup>**, **HL<sup>2</sup>** and complexes **RuL<sup>1</sup>** and **RuL<sup>2</sup>**

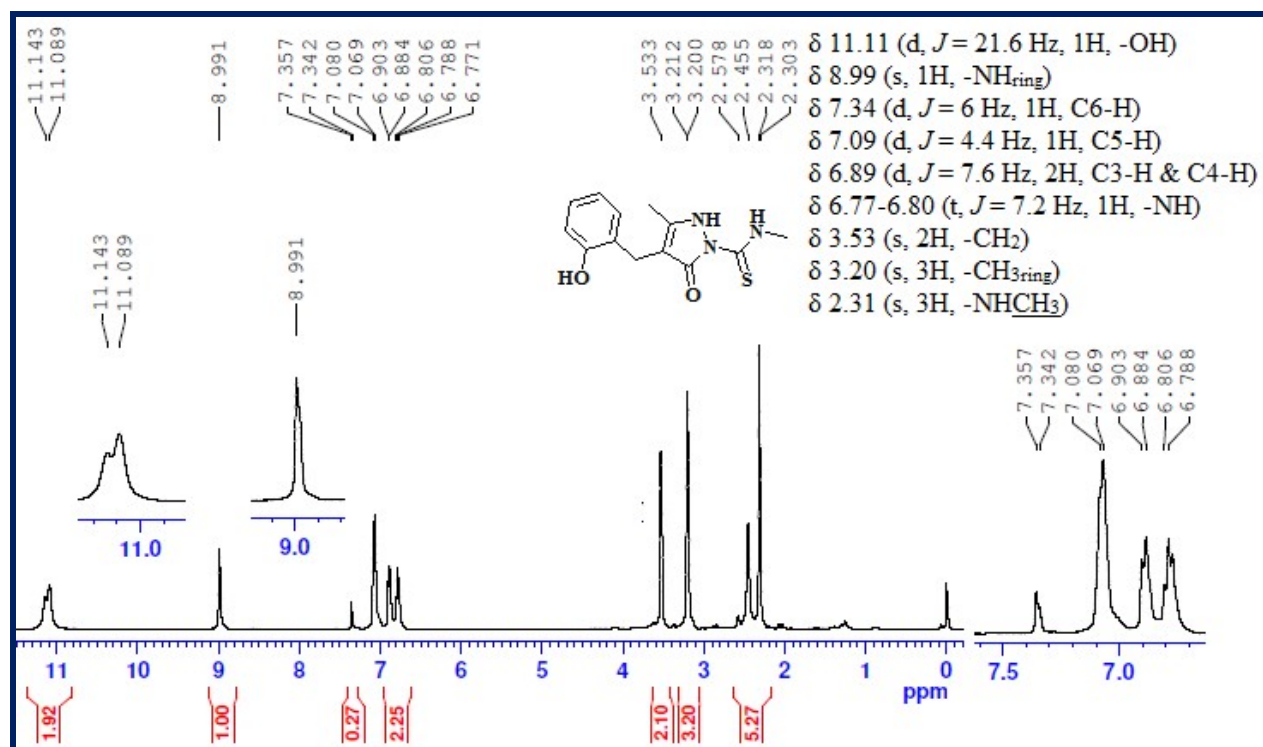

Fig. S2. <sup>1</sup>H NMR spectrum of the ligand **HL<sup>1</sup>**

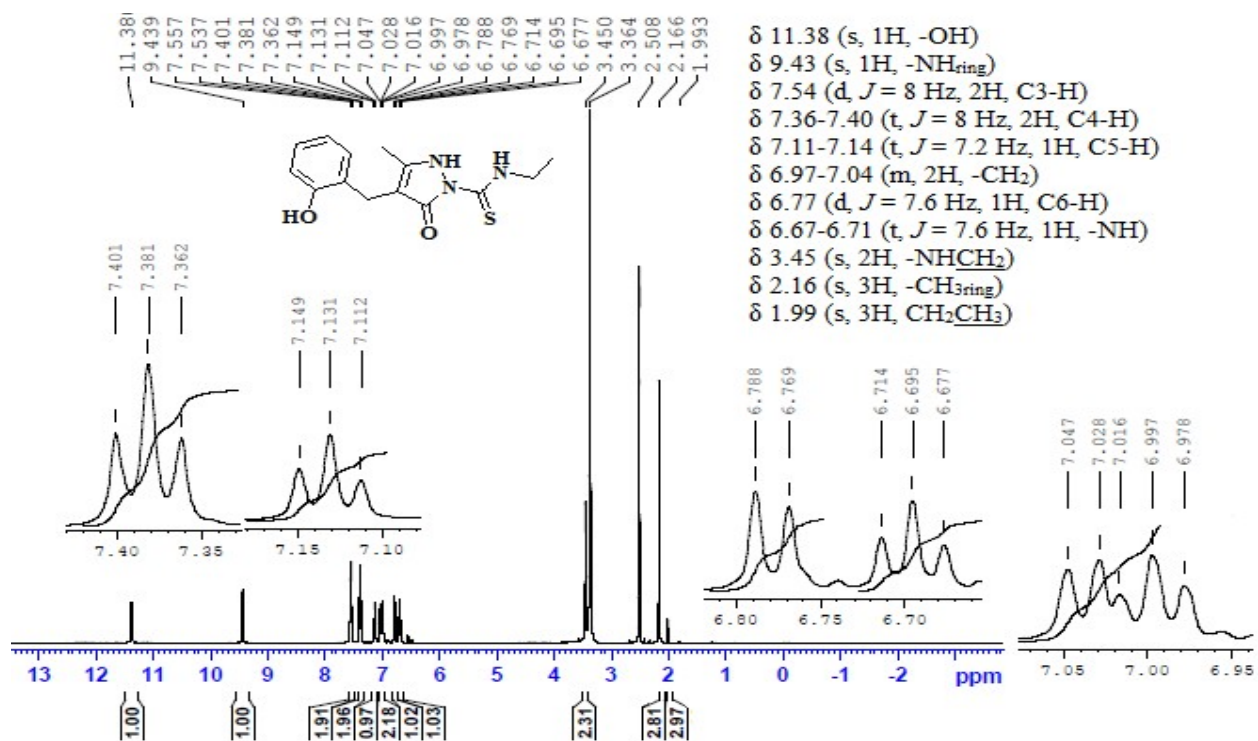

Fig. S3. <sup>1</sup>H NMR spectrum of the ligand **HL<sup>2</sup>**

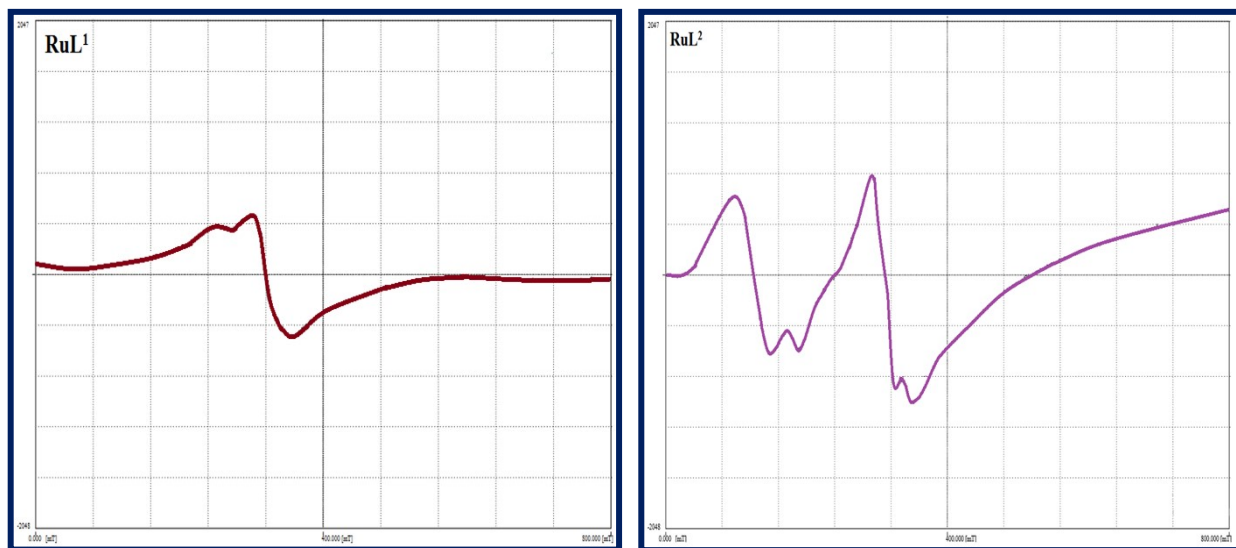

**Fig. S4.** EPR spectra of the Ru(III) complexes **RuL<sup>1</sup>** and **RuL<sup>2</sup>**

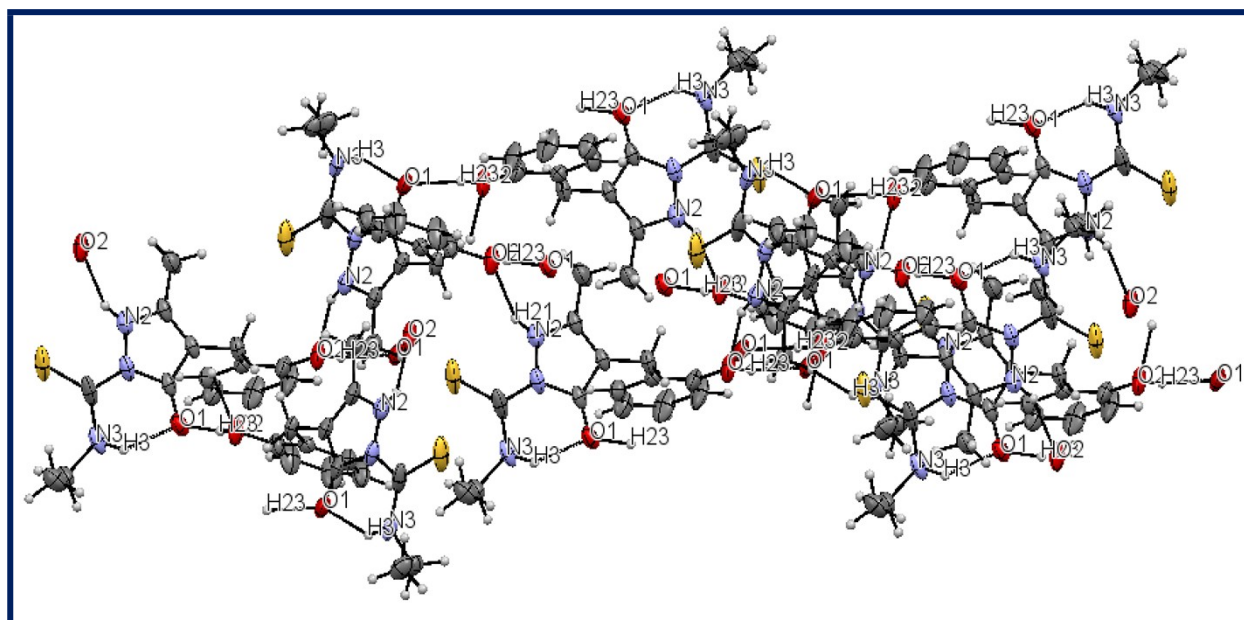

**Fig. S5.** Hydrogen bonding interactions in the ligand **HL<sup>2</sup>**

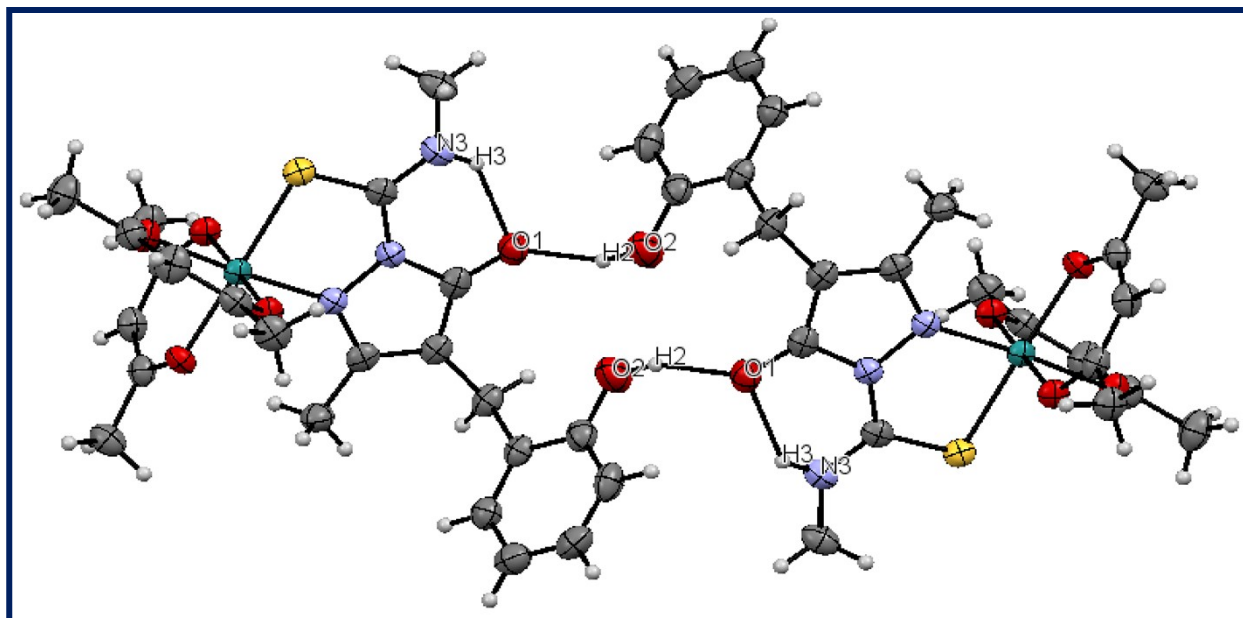

Fig. S6. Hydrogen bonding interaction in the complex **RuL<sup>1</sup>**

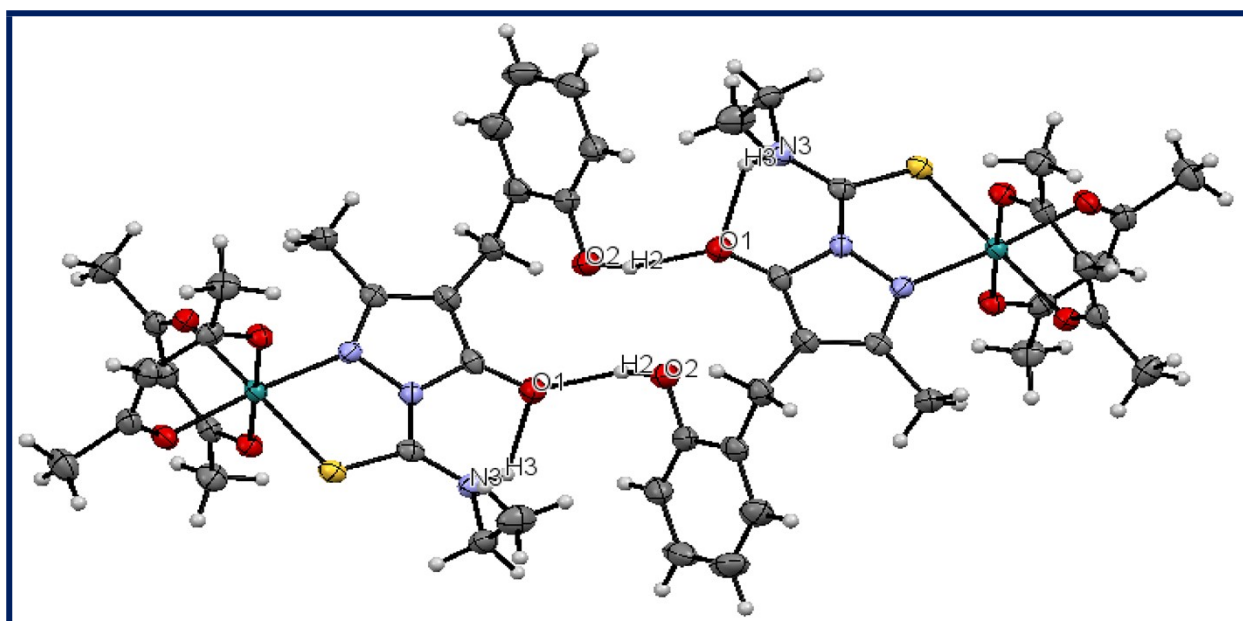

Fig. S7. Hydrogen bonding interaction in the complex **RuL<sup>2</sup>**



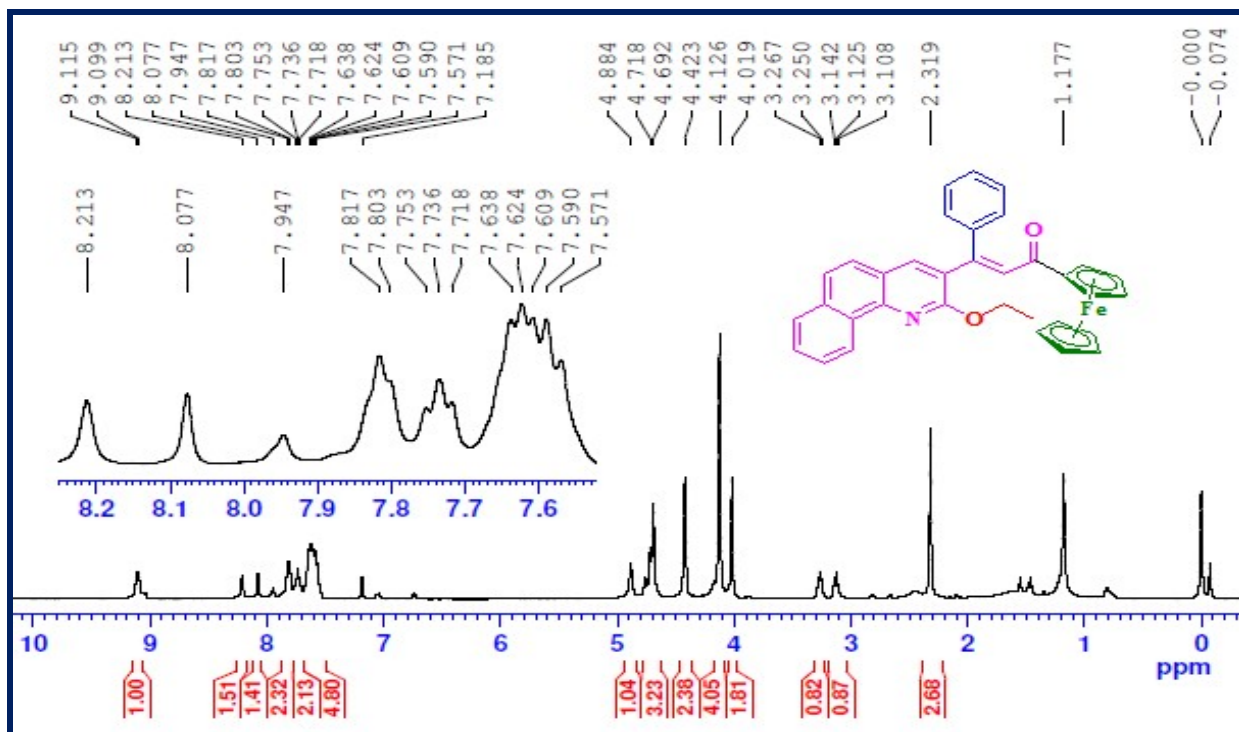

Fig. S8.  $^1\text{H}$  NMR spectrum of A1

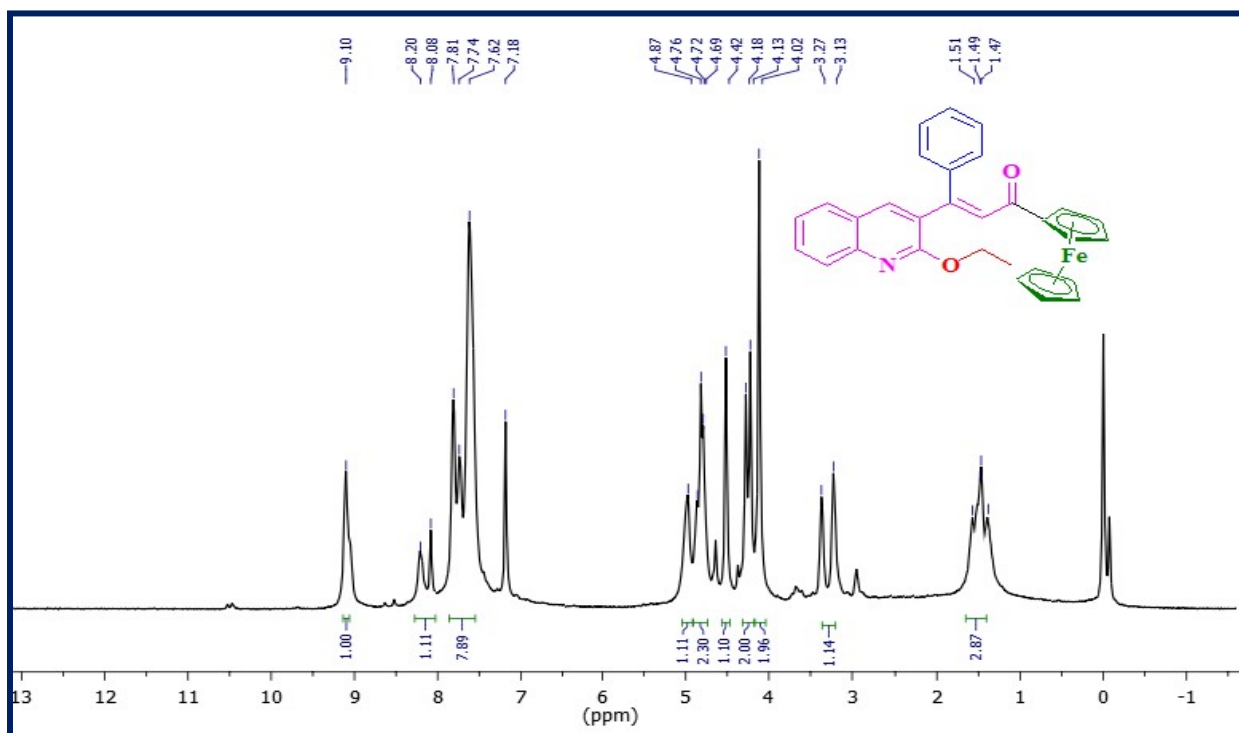

Fig. S9.  $^1\text{H}$  NMR spectrum of A2

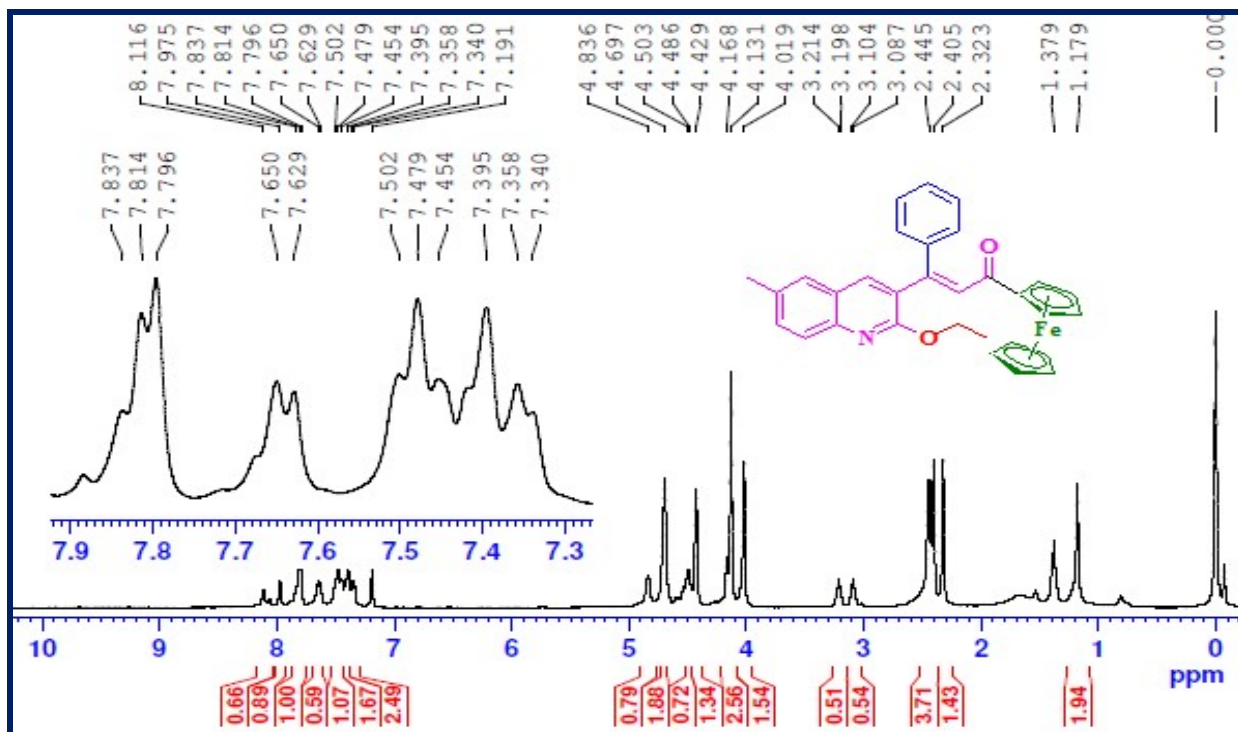

Fig. S10.  $^1\text{H}$  NMR spectrum of A3

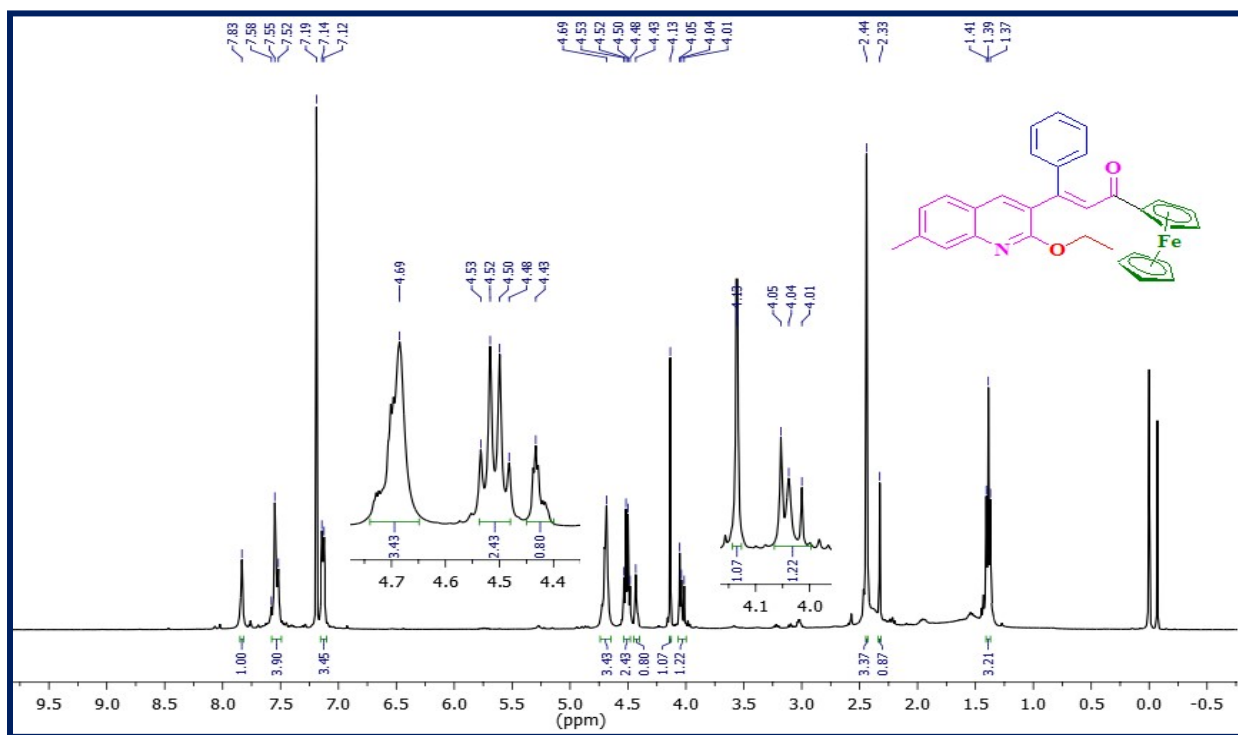

Fig. S11.  $^1\text{H}$  NMR spectrum of A4

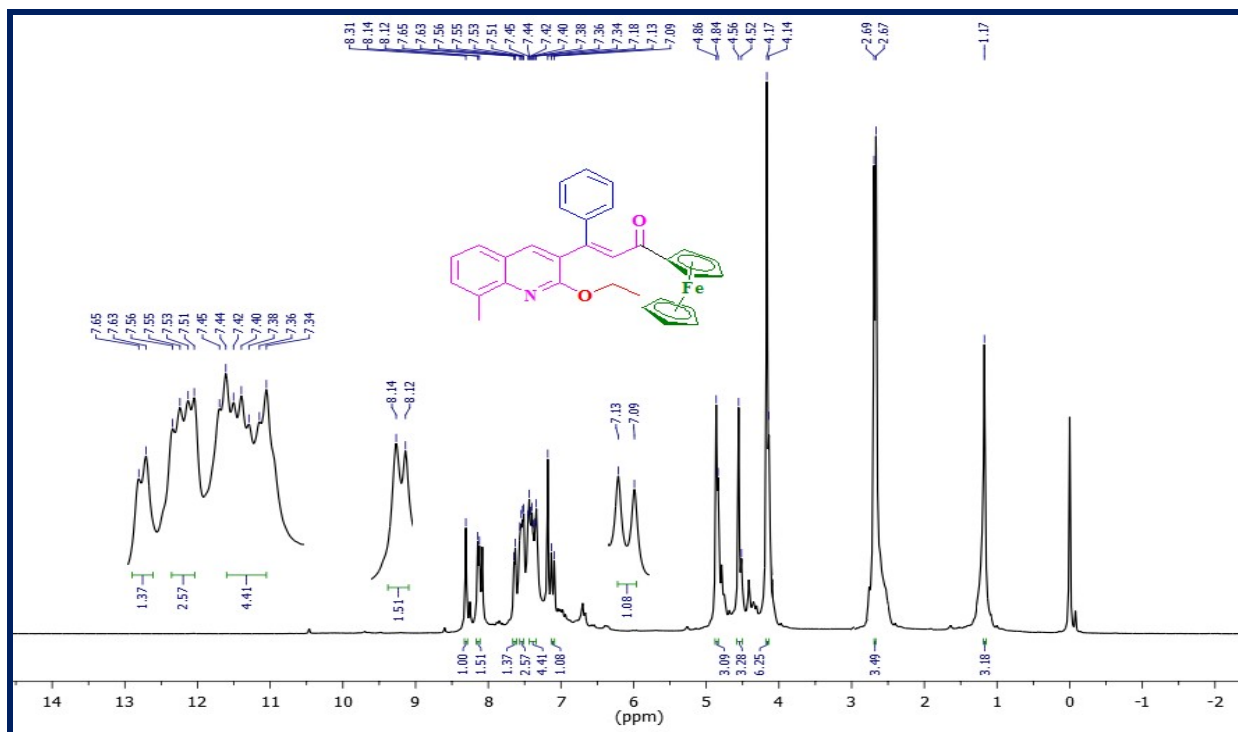

Fig. S12.  $^1\text{H}$  NMR spectrum of A5

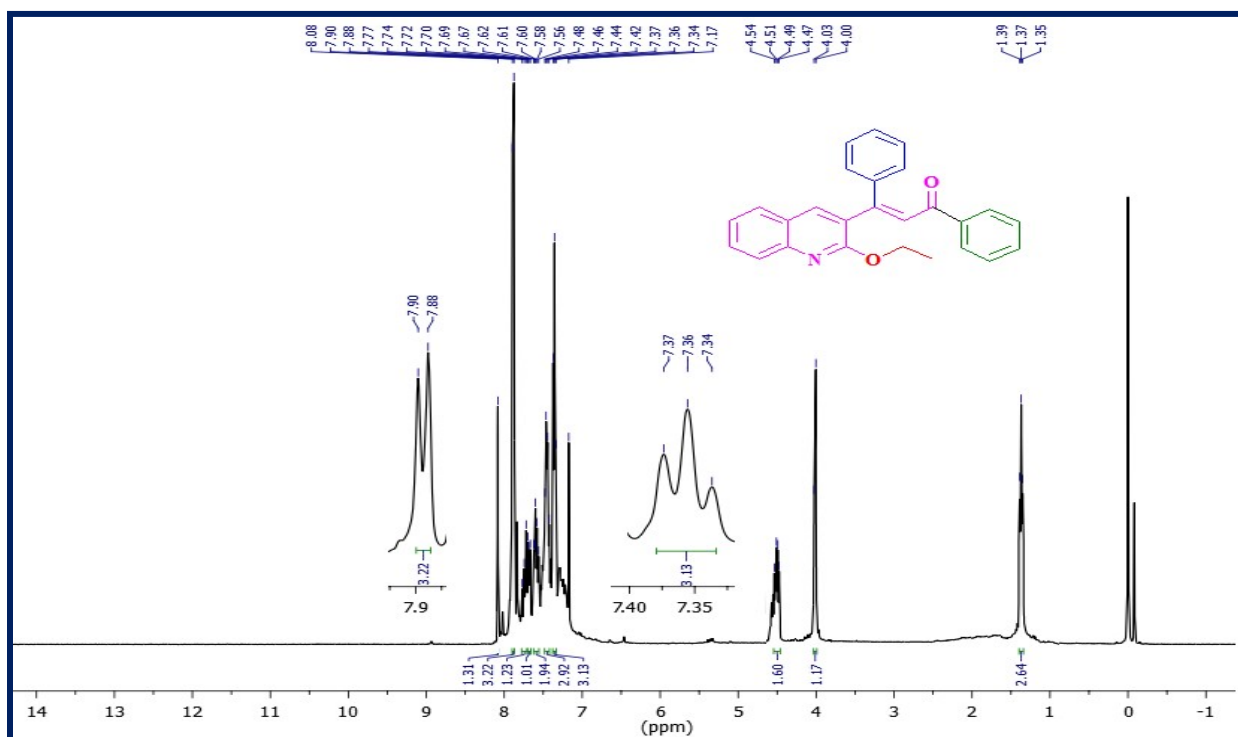

Fig. S13.  $^1\text{H}$  NMR spectrum of A6

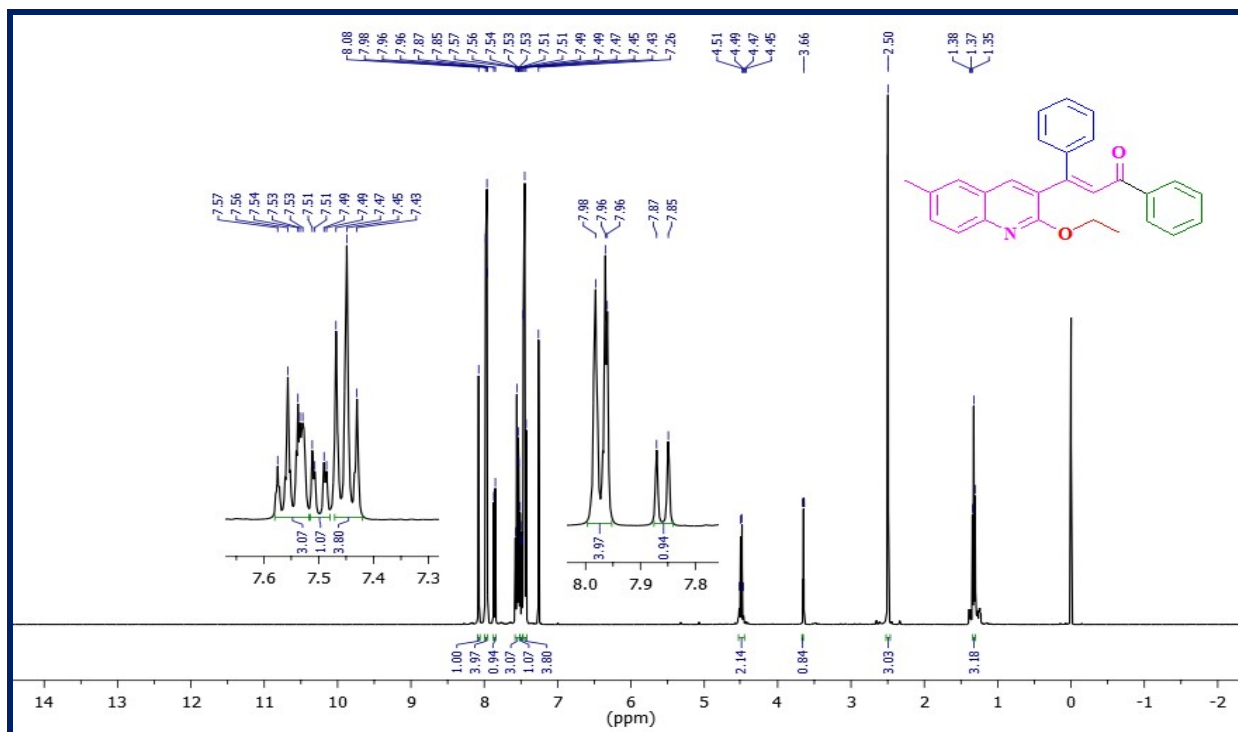

Fig. S14.  $^1\text{H}$  NMR spectrum of A7

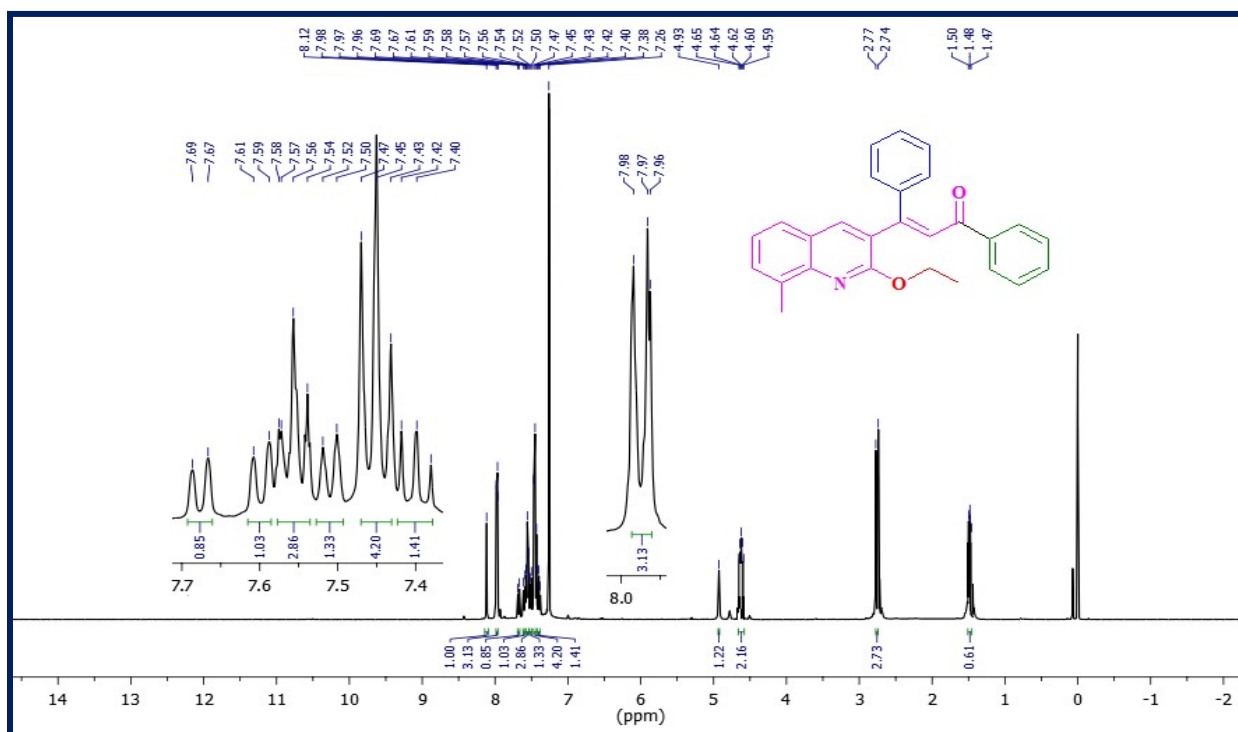

Fig. S15.  $^1\text{H}$  NMR spectrum of A8

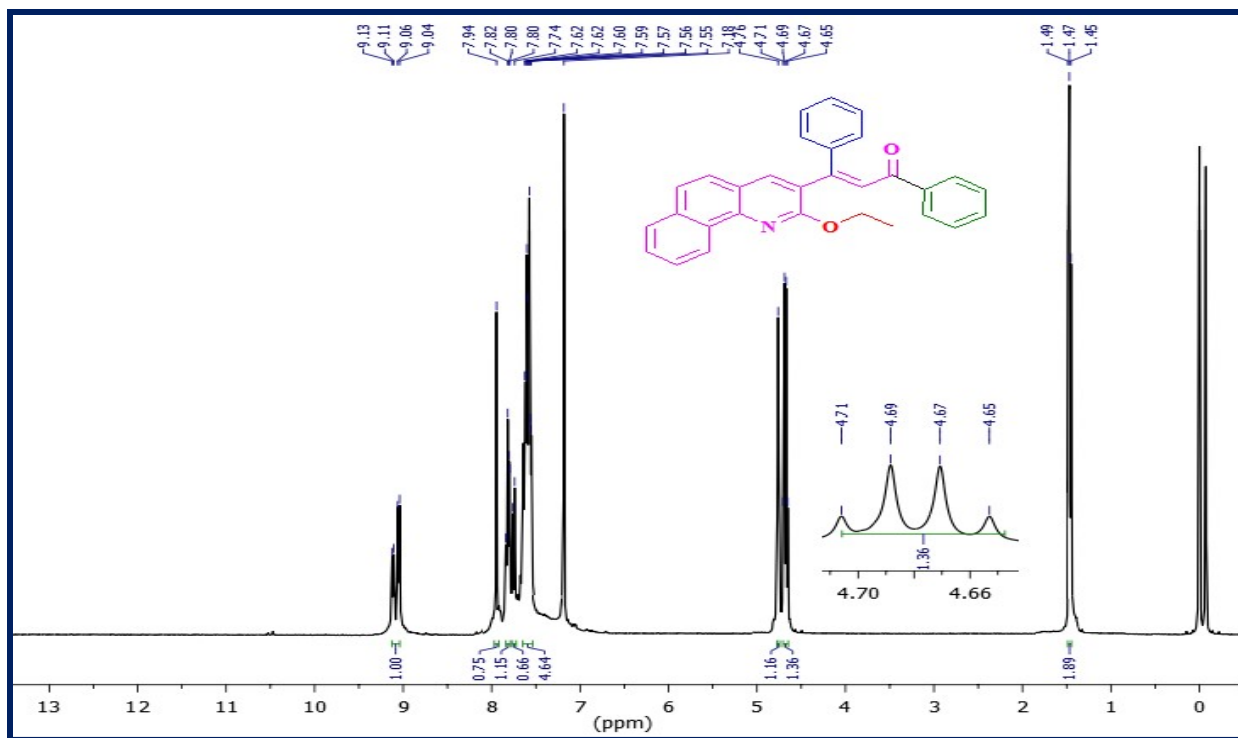

Fig. S16.  $^1\text{H}$  NMR spectrum of A9

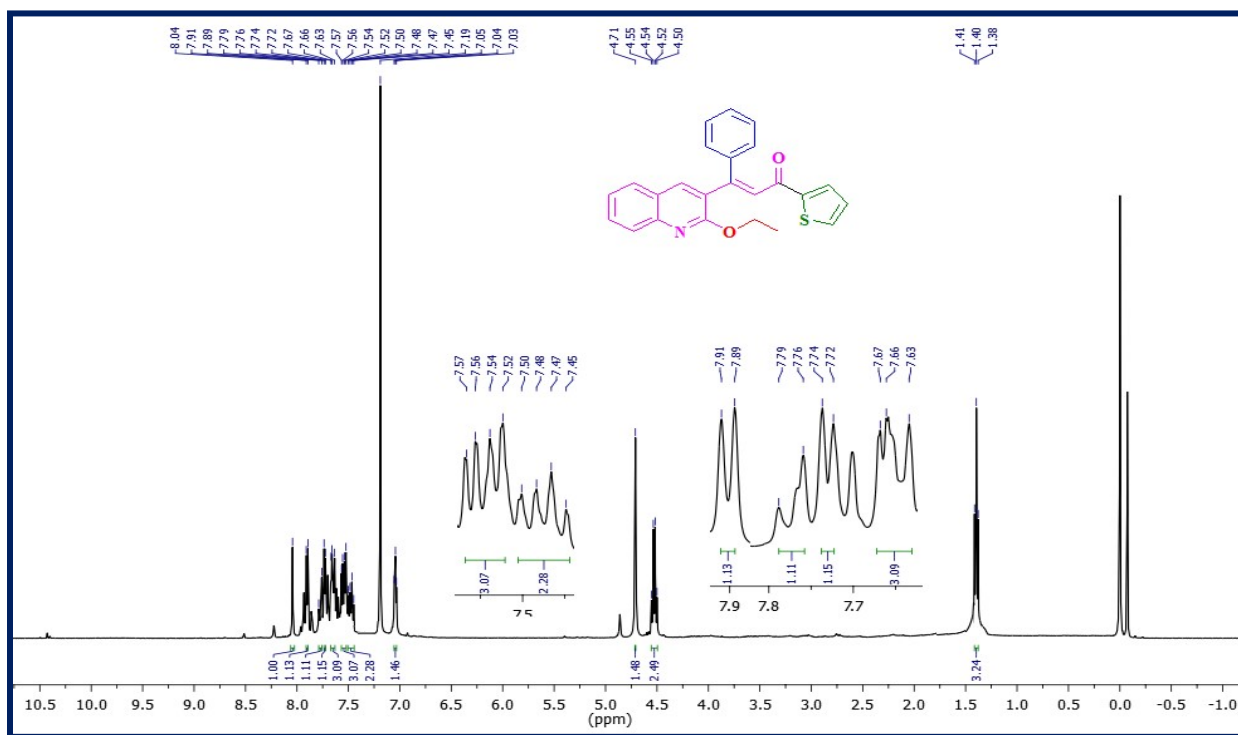

Fig. S17.  $^1\text{H}$  NMR spectrum of A10

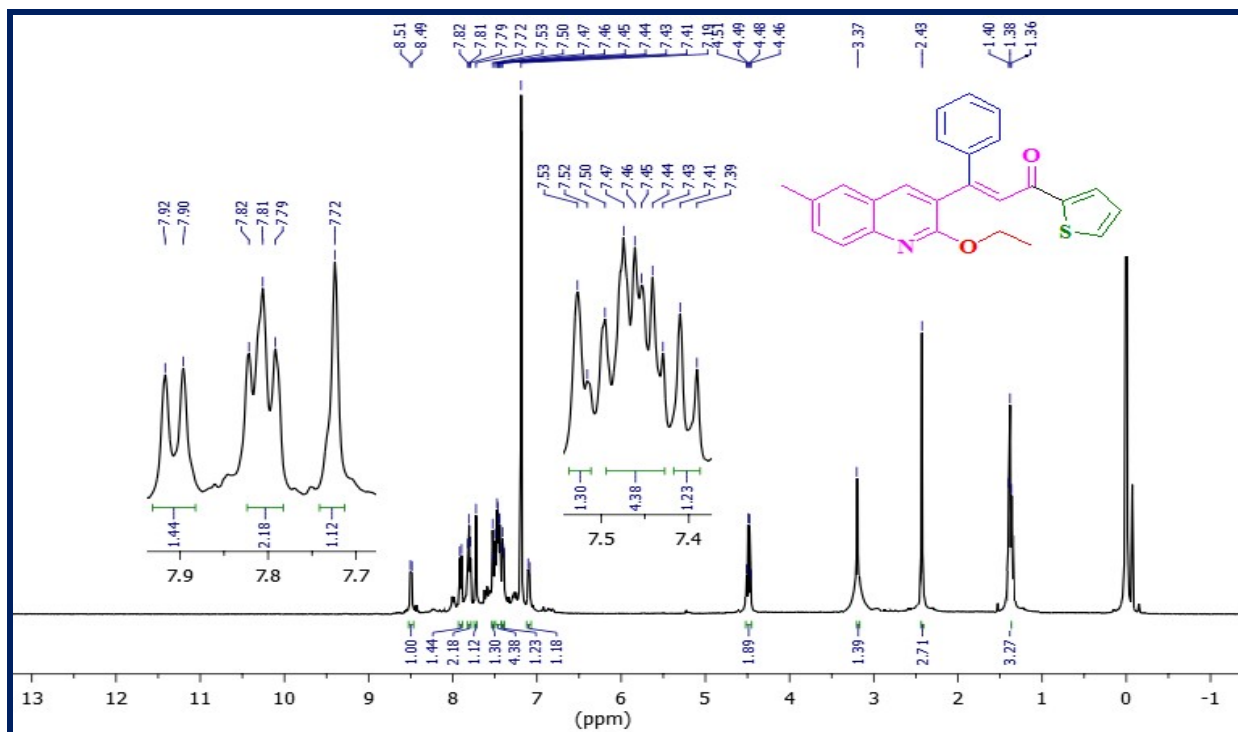

Fig. S18.  $^1\text{H}$  NMR spectrum of A11

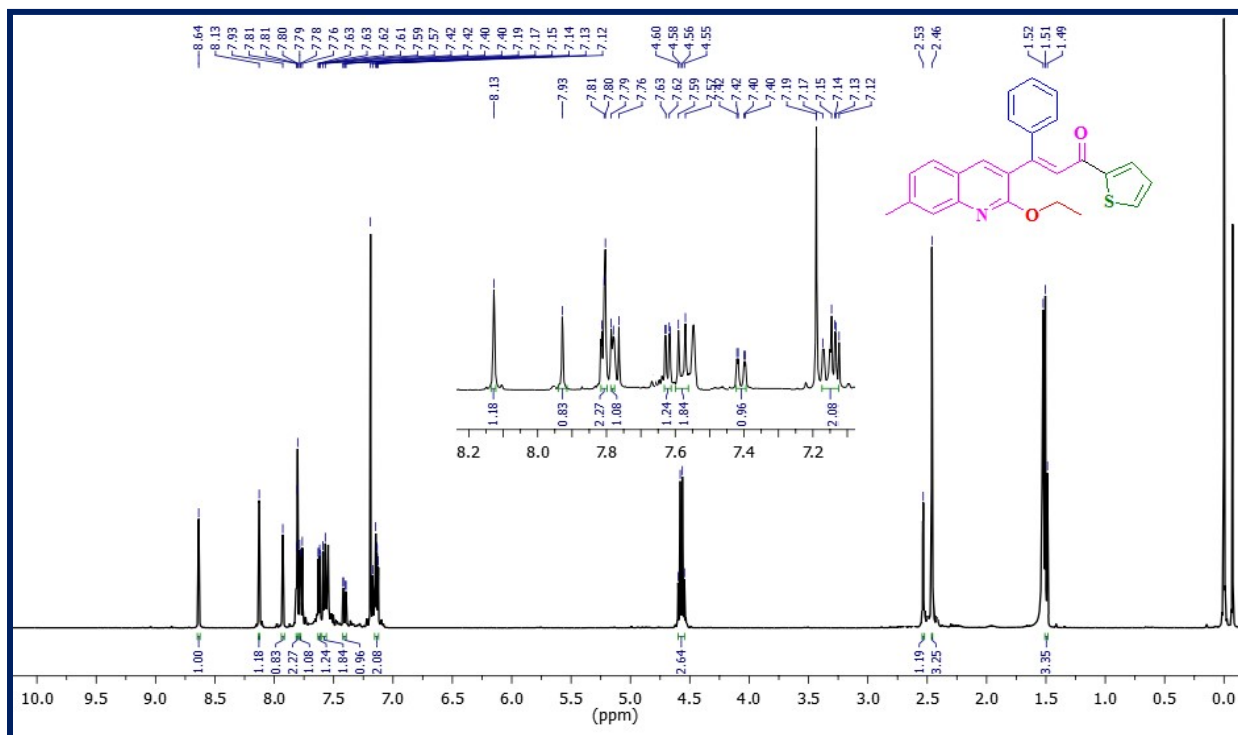

Fig. S19.  $^1\text{H}$  NMR spectrum of A12

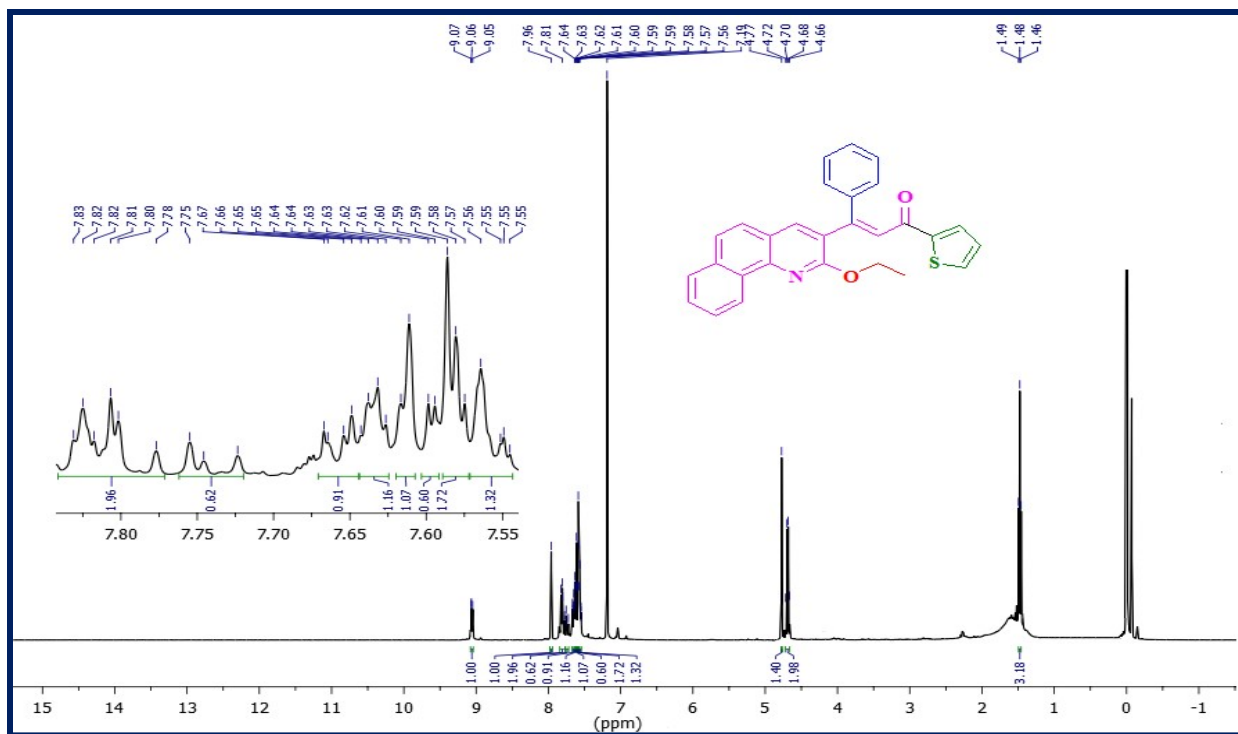

Fig. S20. <sup>1</sup>H NMR spectrum of A13

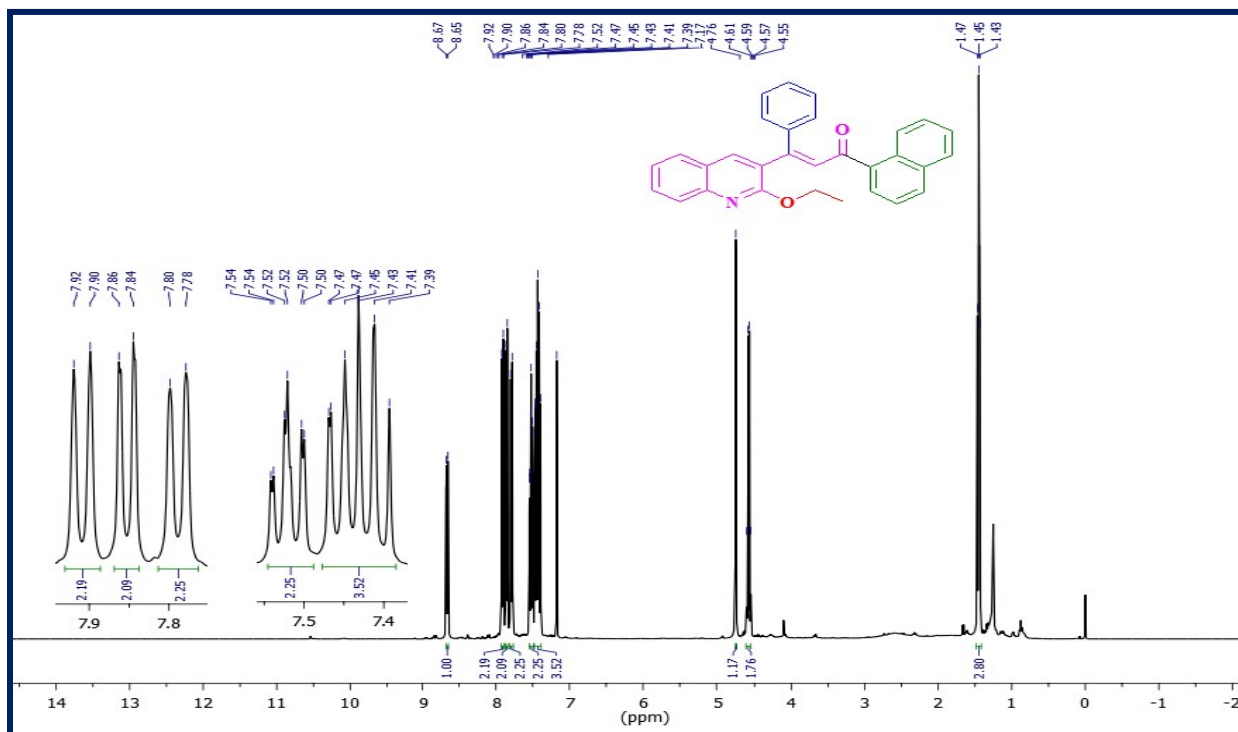

Fig. S21. <sup>1</sup>H NMR spectrum of A14

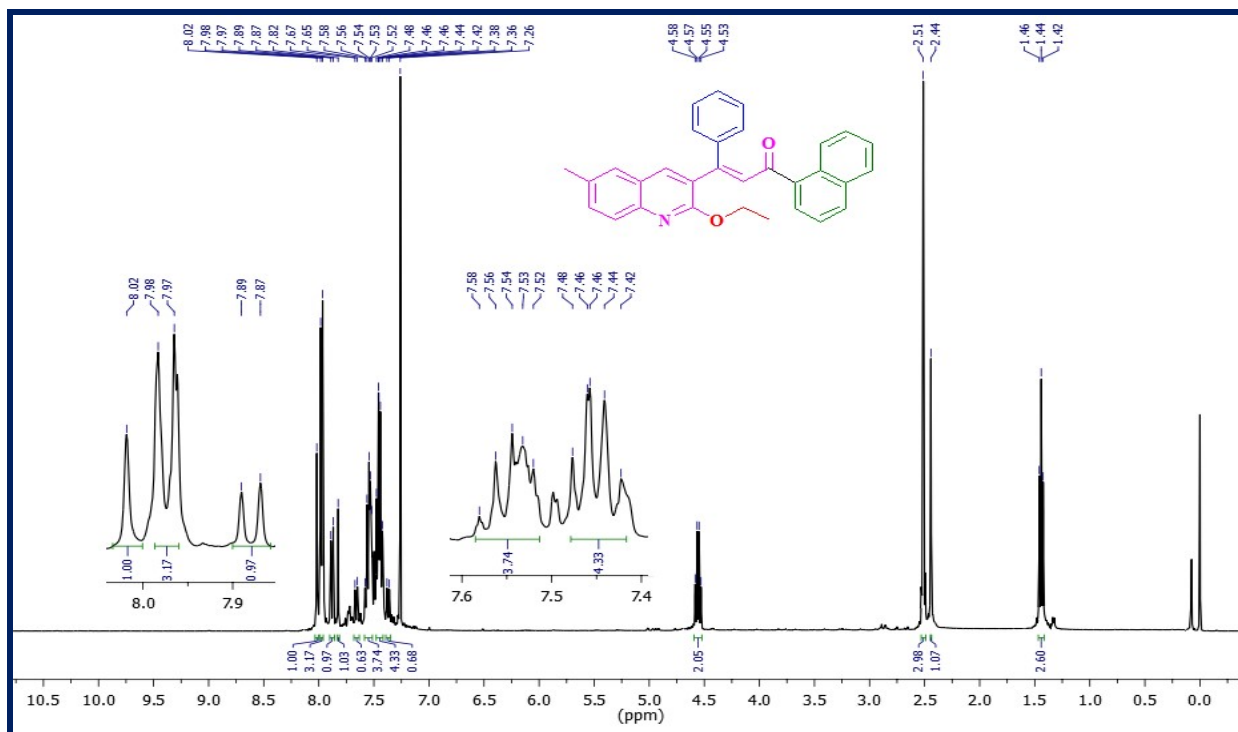

Fig. S22. <sup>1</sup>H NMR spectrum of A15

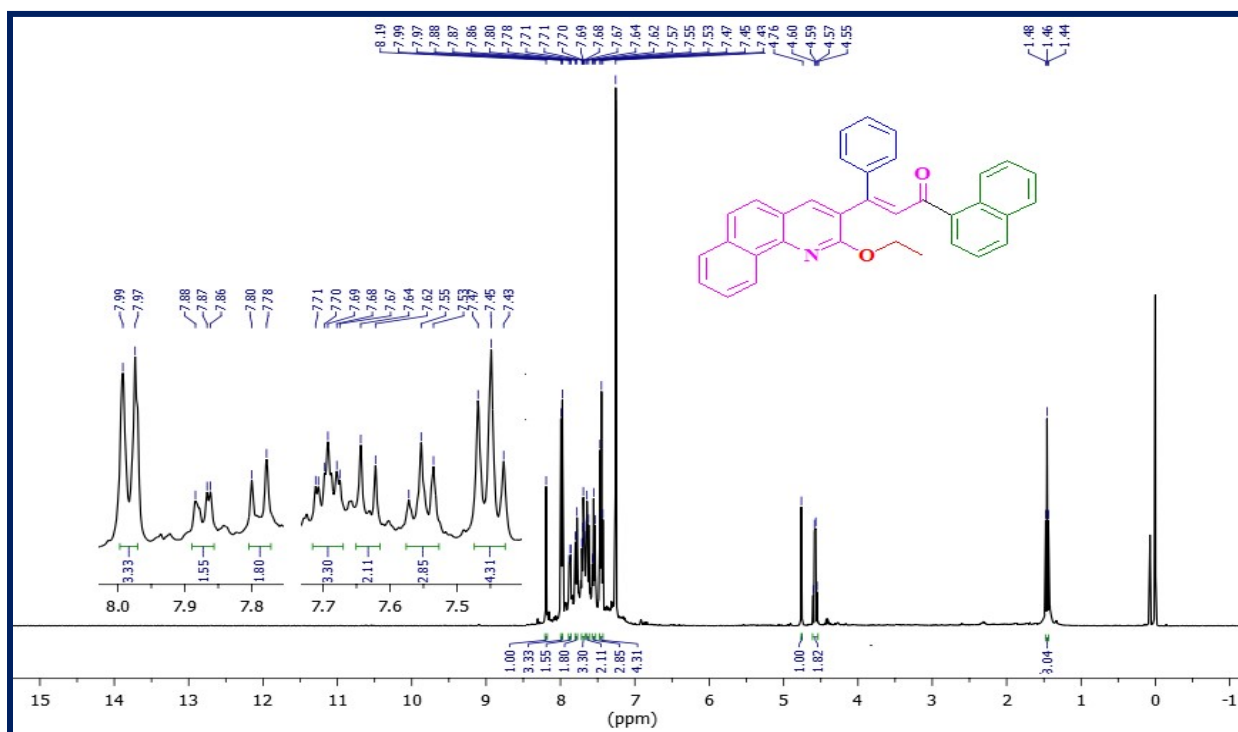

Fig. S23. <sup>1</sup>H NMR spectrum of A16



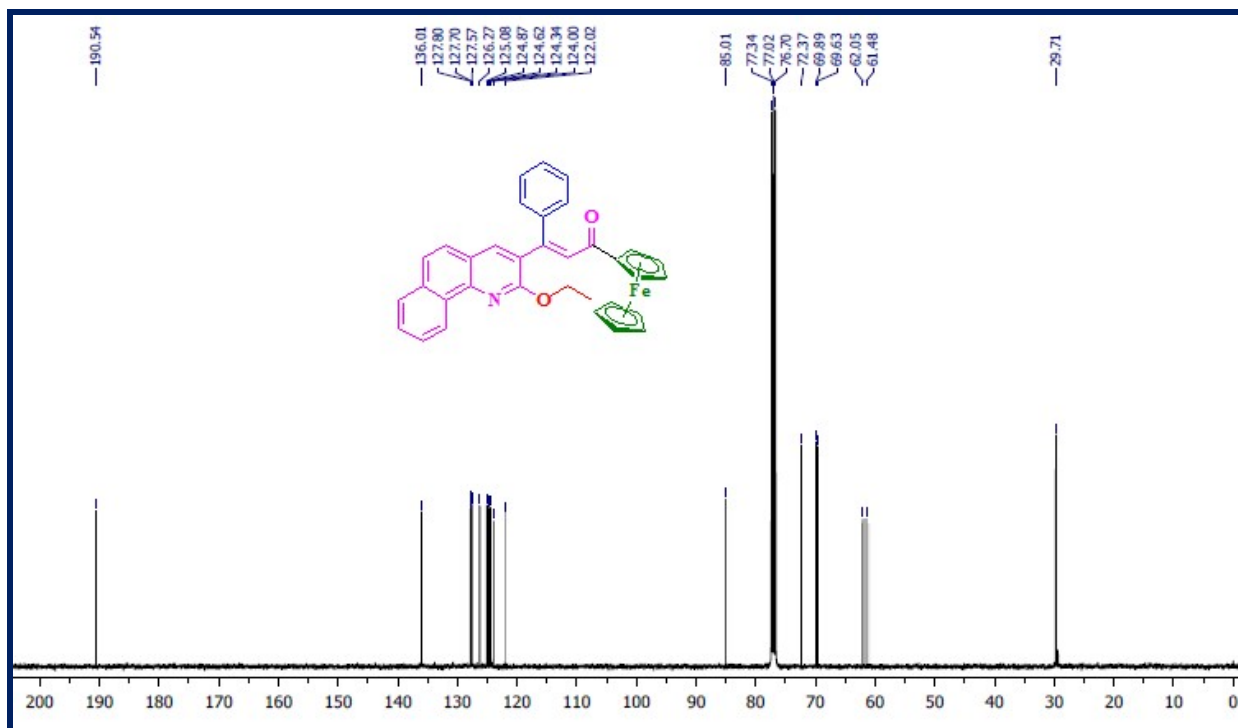

Fig. S24.  $^{13}\text{C}$  NMR spectrum of A1

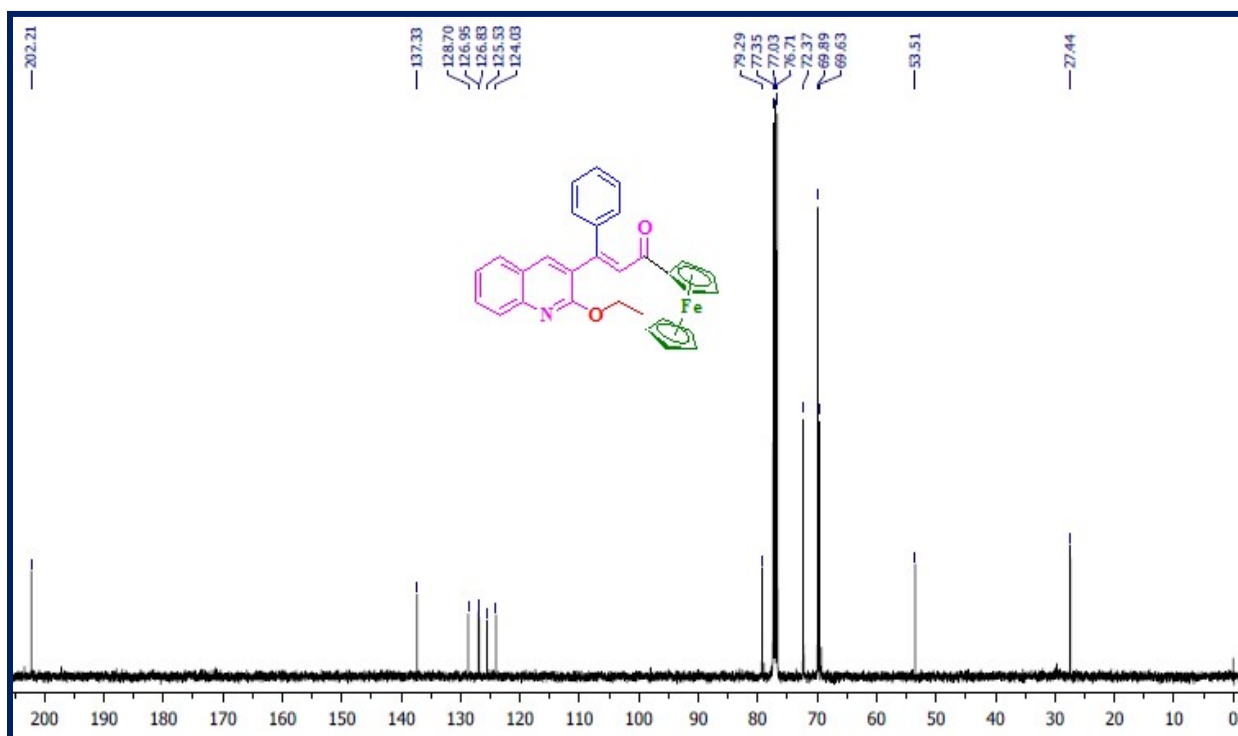

Fig. S25.  $^{13}\text{C}$  NMR spectrum of A2

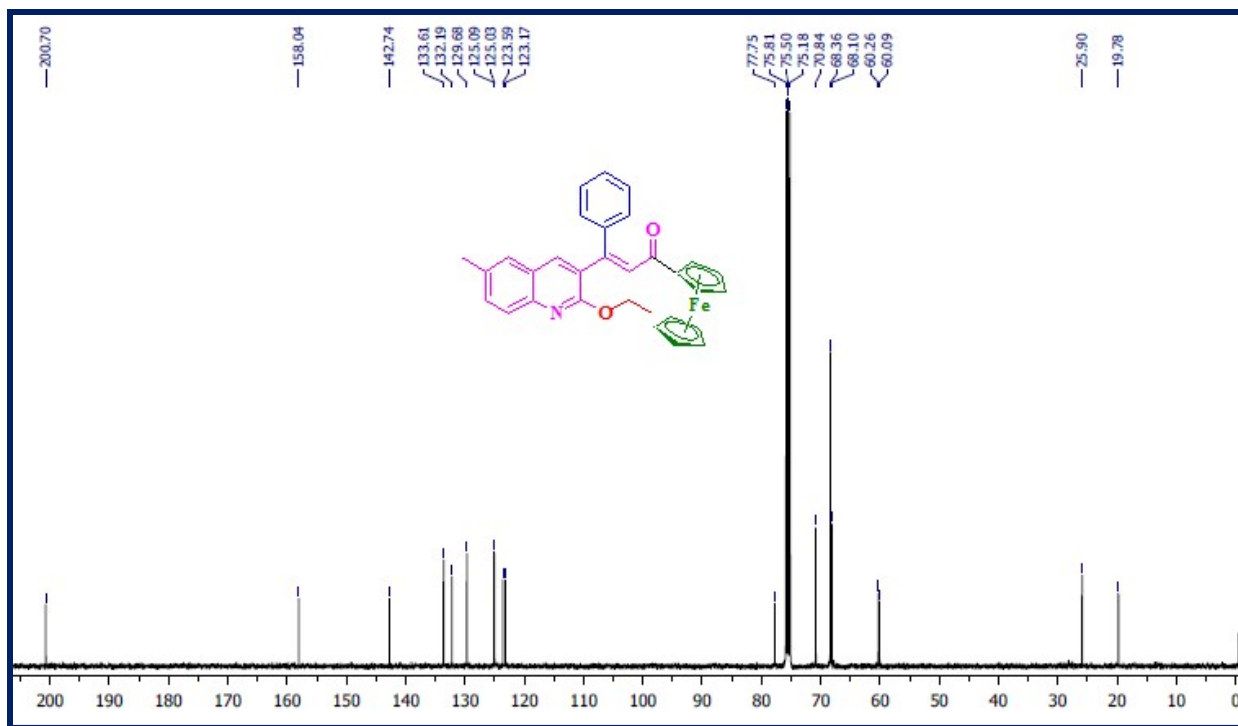

Fig. S26.  $^{13}\text{C}$  NMR spectrum of A3

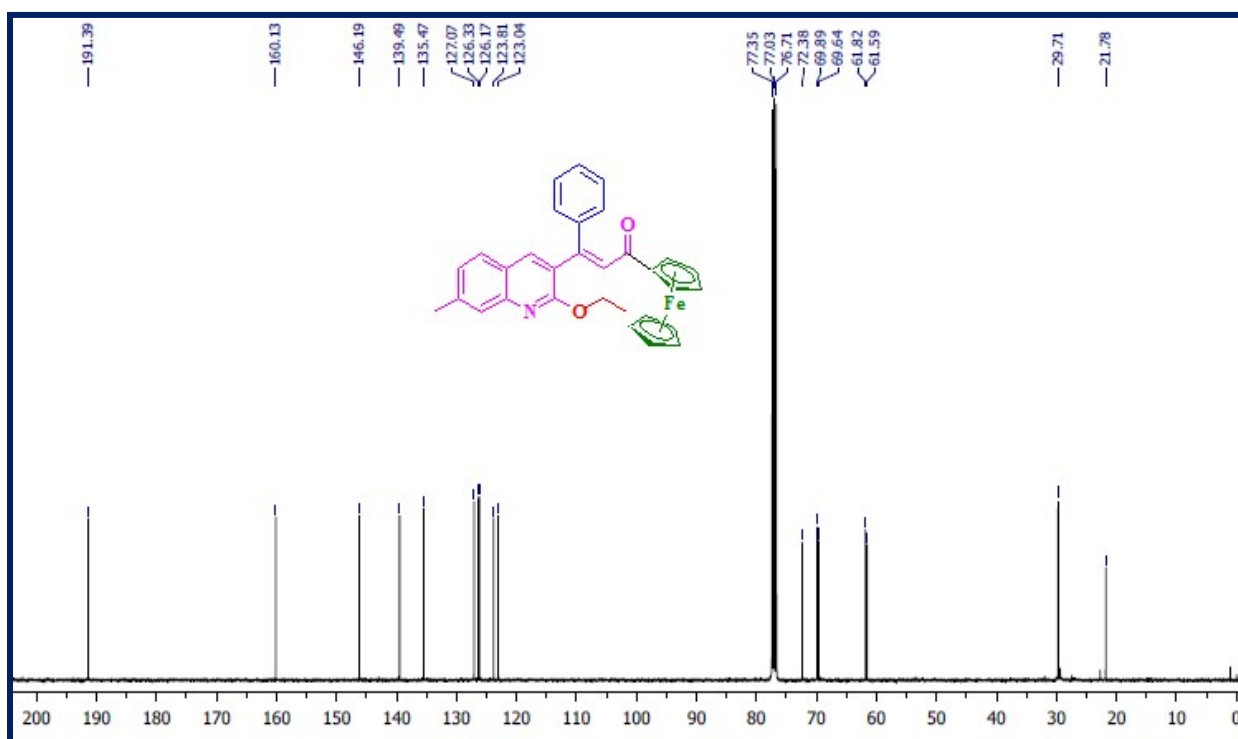

Fig. S27.  $^{13}\text{C}$  NMR spectrum of A4

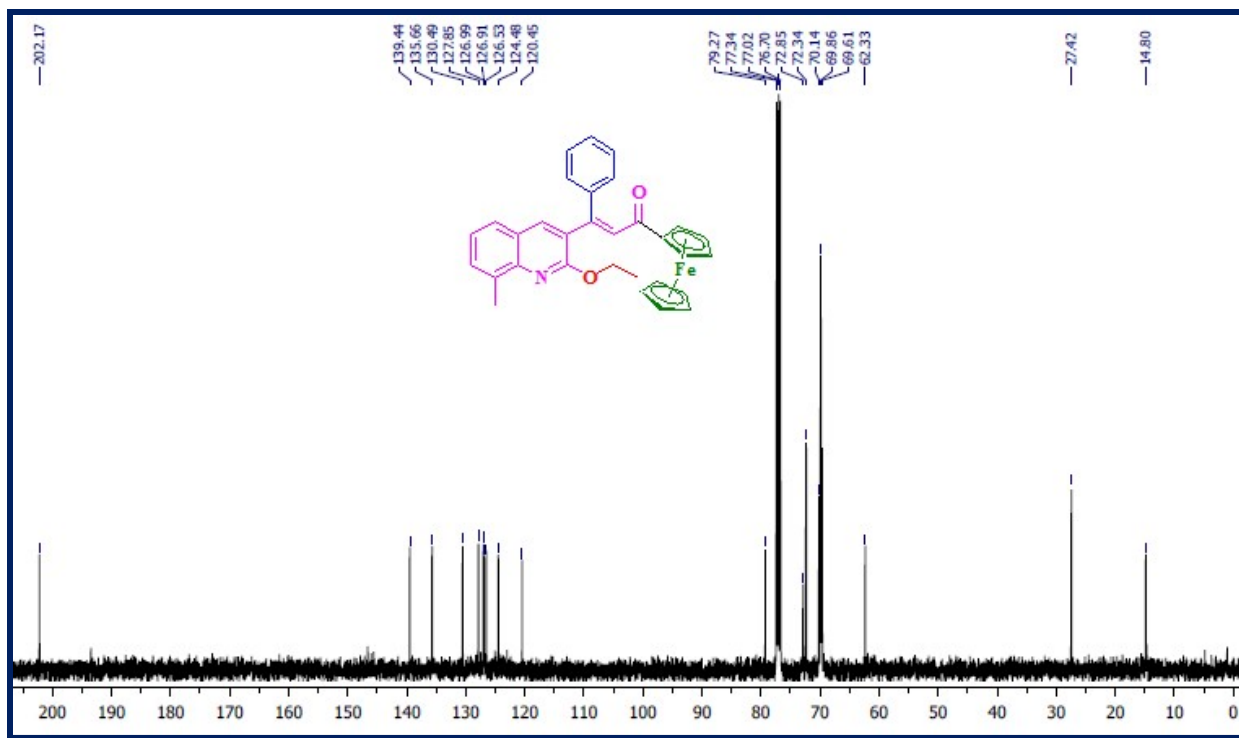

Fig. S28. <sup>13</sup>C NMR spectrum of A5

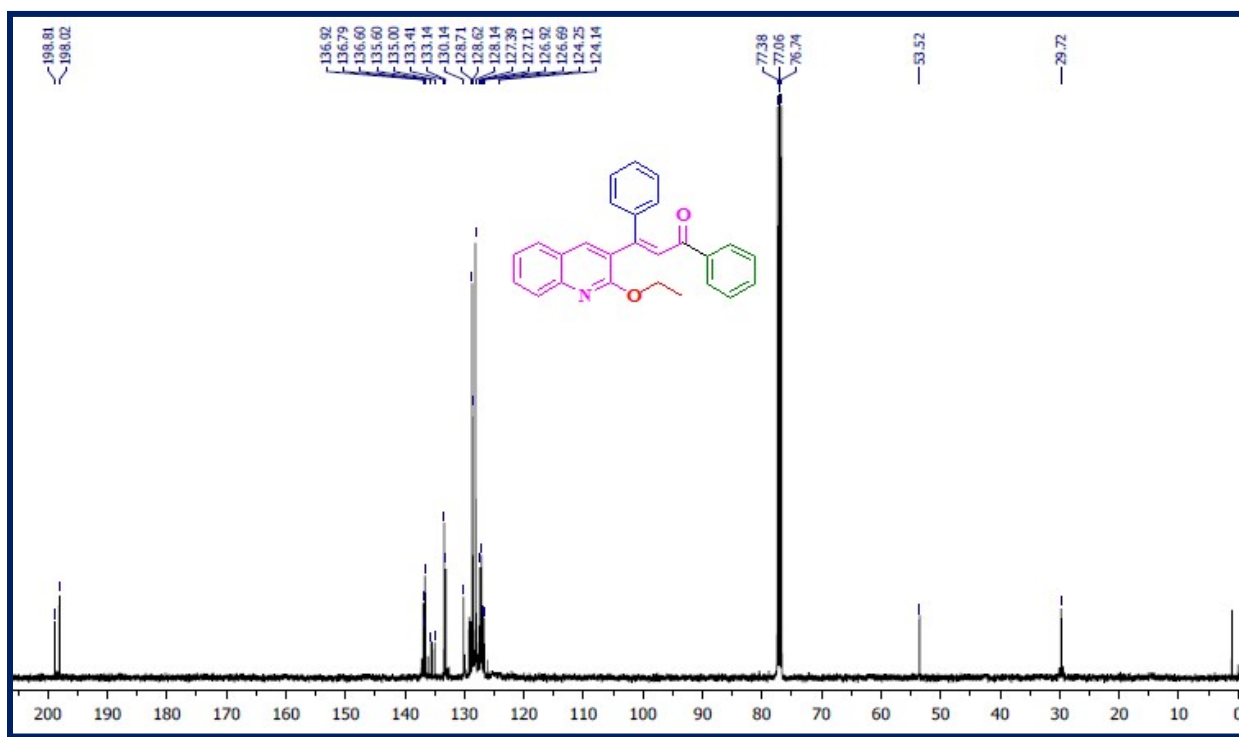

Fig. S29. <sup>13</sup>C NMR spectrum of A6

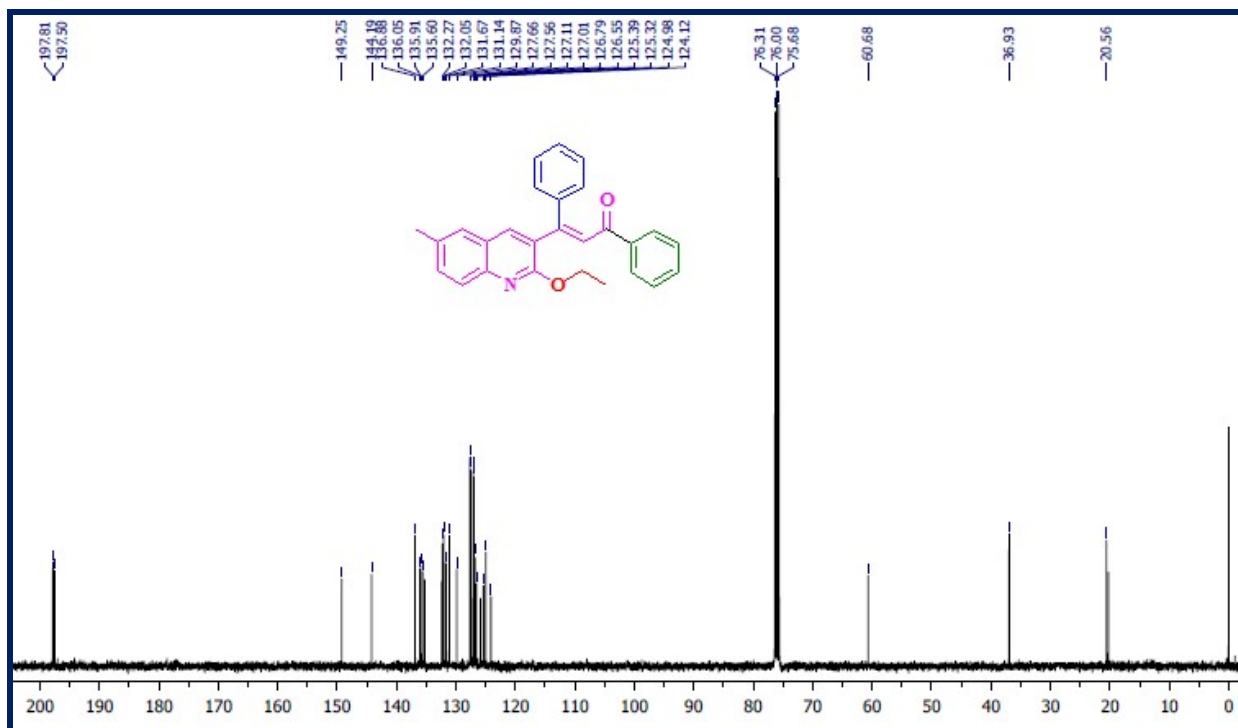

Fig. S30.  $^{13}\text{C}$  NMR spectrum of A7

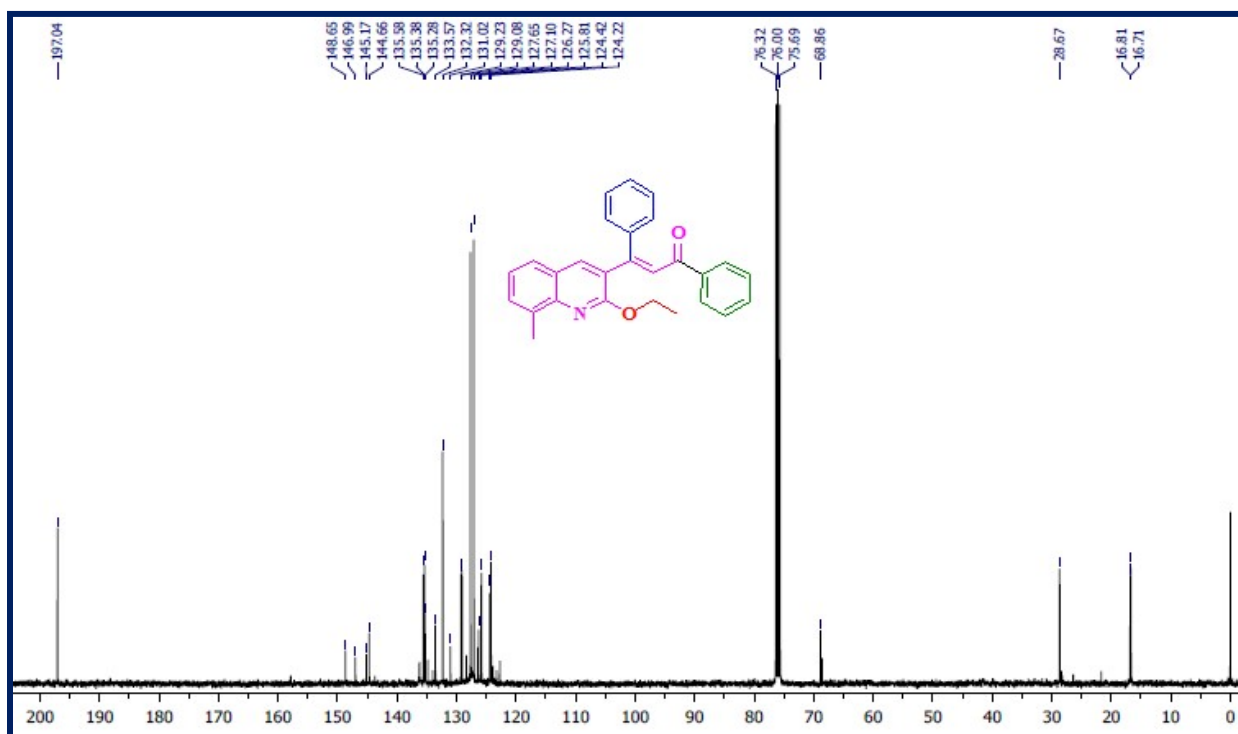

Fig. S31.  $^{13}\text{C}$  NMR spectrum of A8

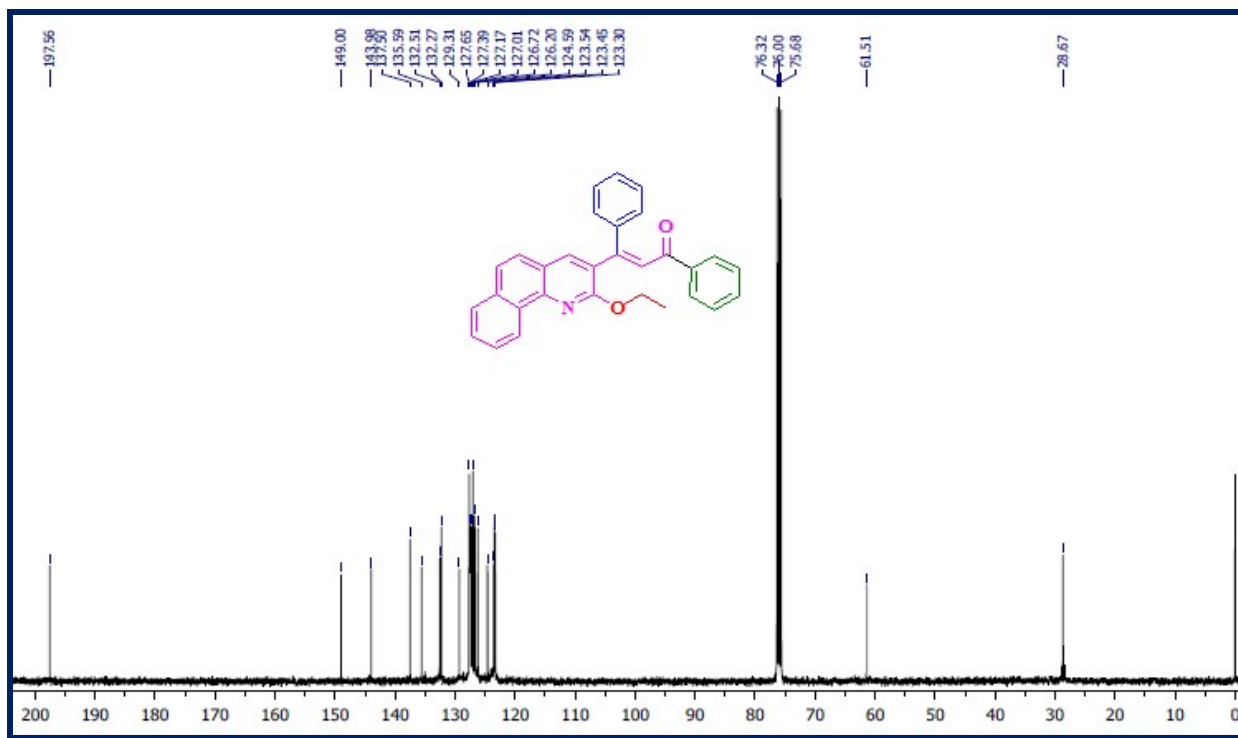

Fig. S32. <sup>13</sup>C NMR spectrum of A9

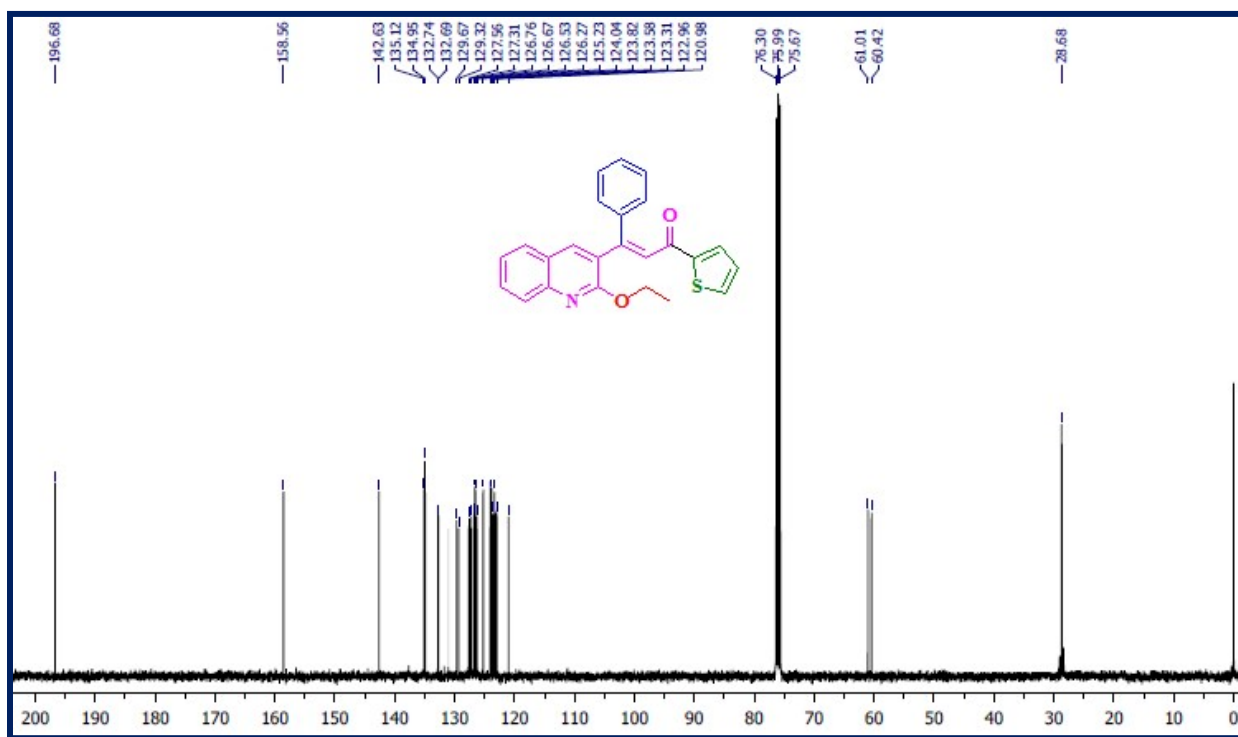

Fig. S33. <sup>13</sup>C NMR spectrum of A10

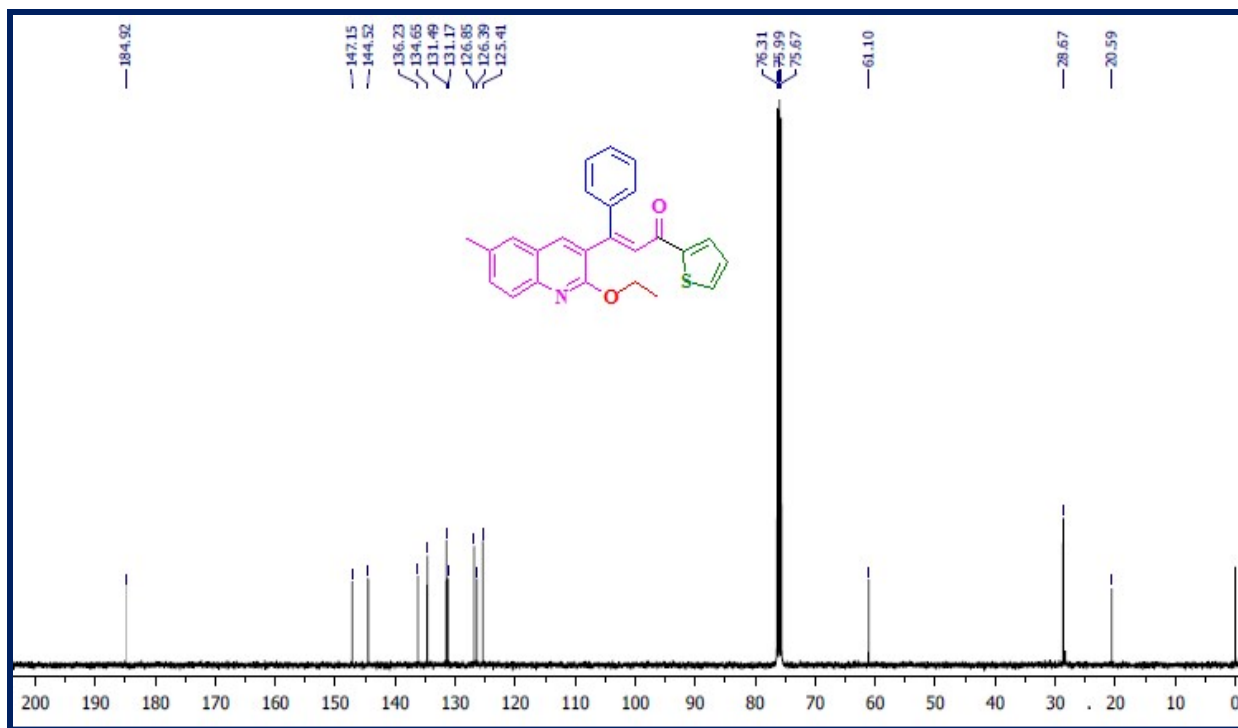

Fig. S34.  $^{13}\text{C}$  NMR spectrum of A11

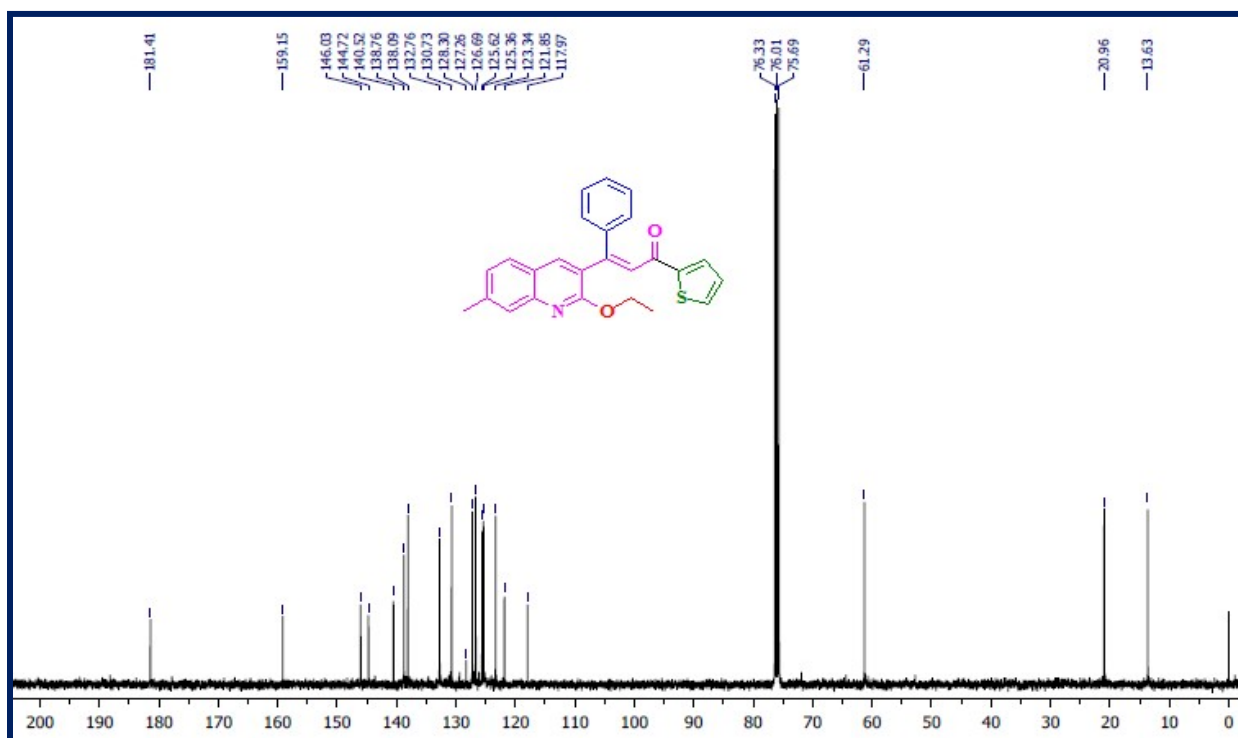

Fig. S35.  $^{13}\text{C}$  NMR spectrum of A12

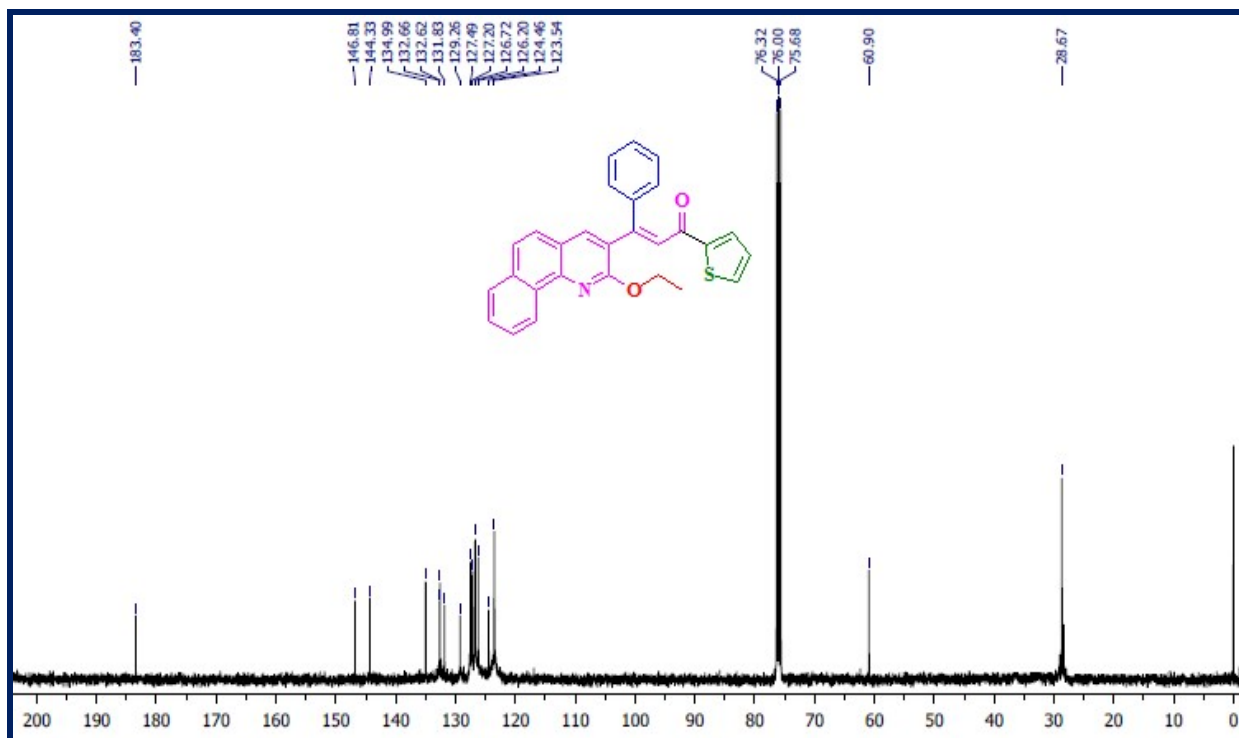

Fig. S36. <sup>13</sup>C NMR spectrum of A13

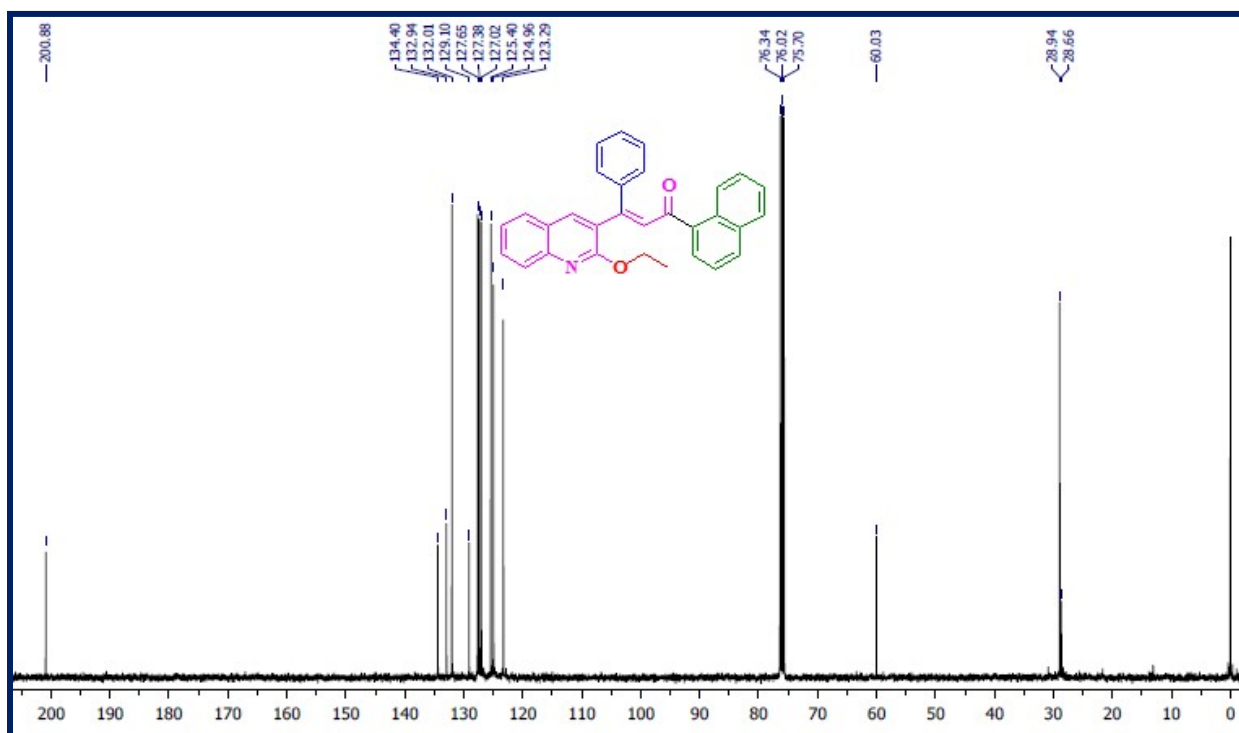

Fig. S37. <sup>13</sup>C NMR spectrum of A14

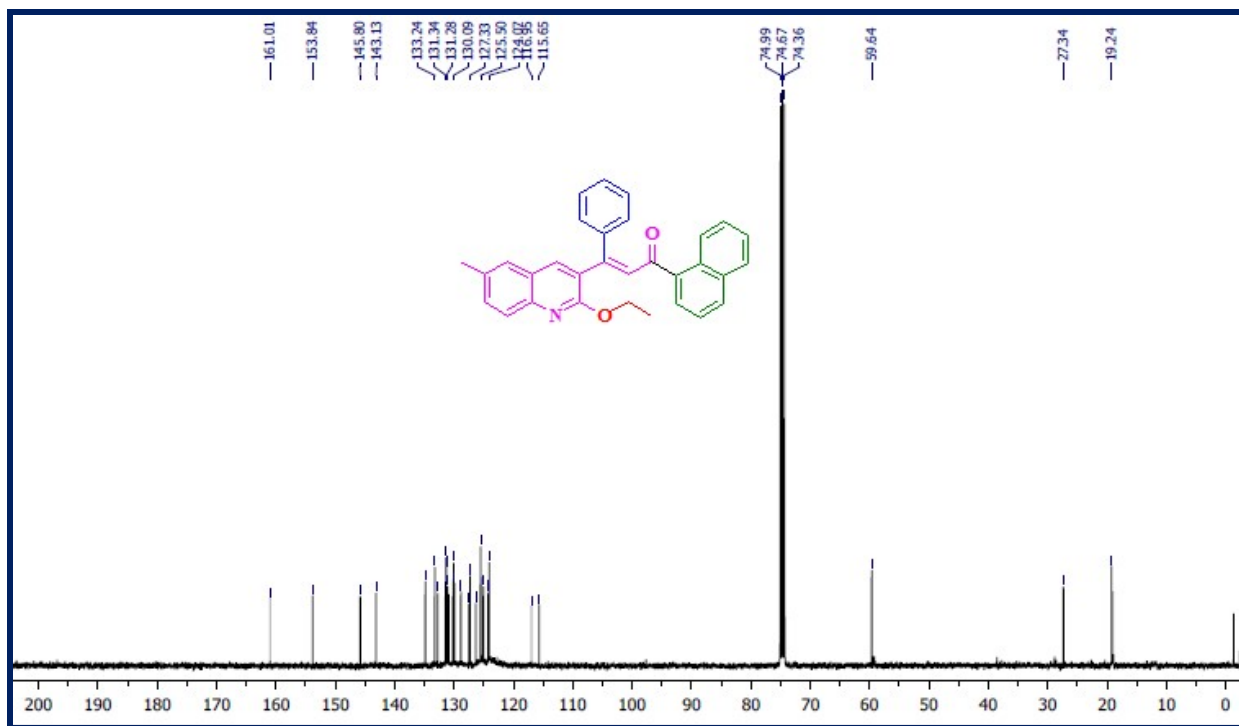

Fig. S38. <sup>13</sup>C NMR spectrum of A15

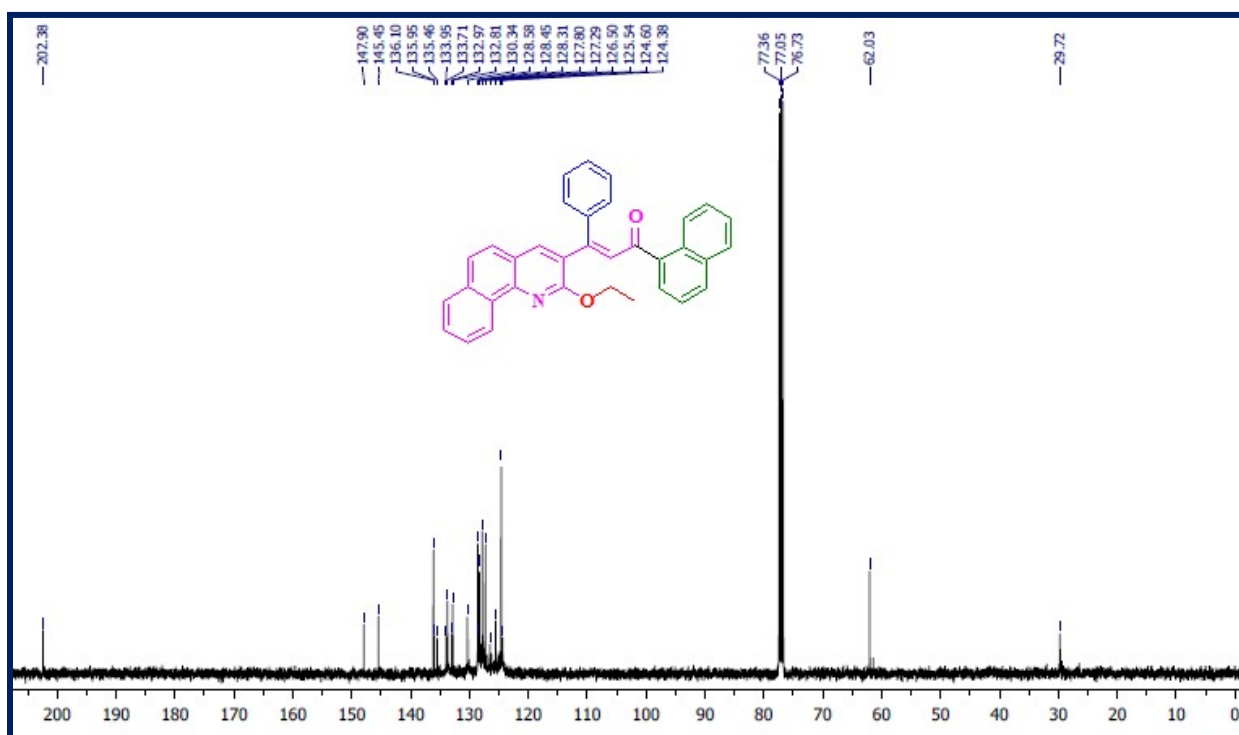

Fig. S39. <sup>13</sup>C NMR spectrum of A16



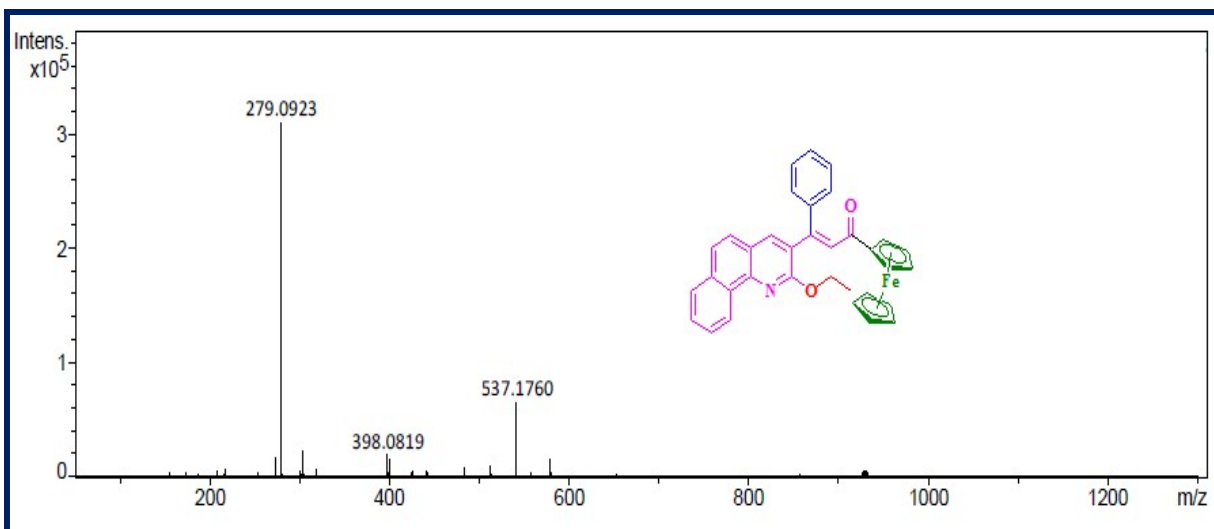

Fig. S40. Mass spectrum of A1

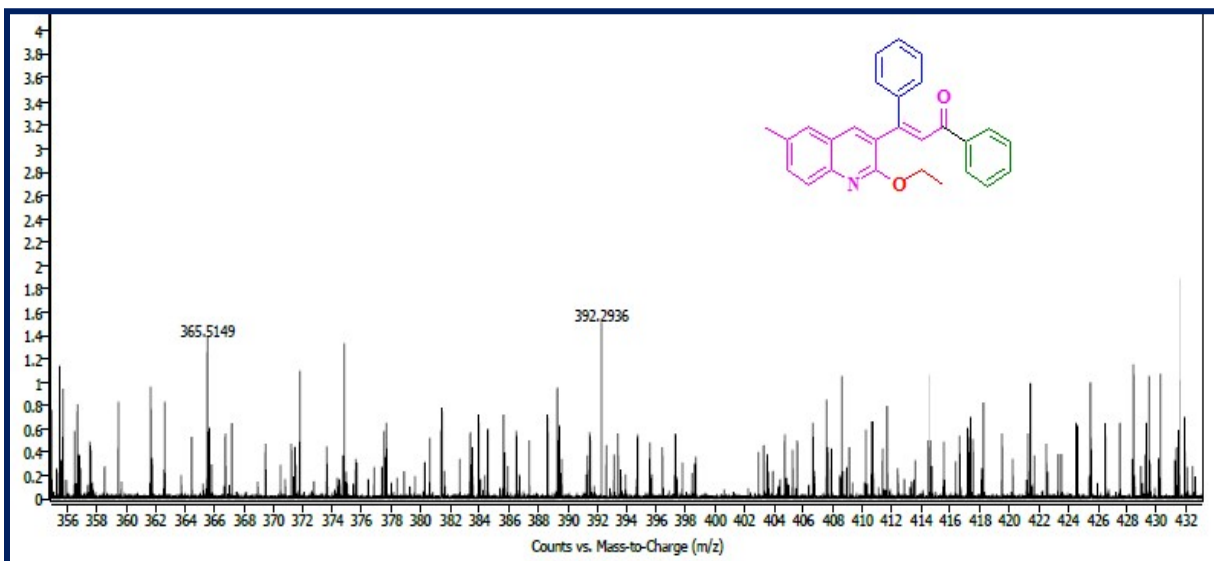

Fig. S41. Mass spectrum of A7

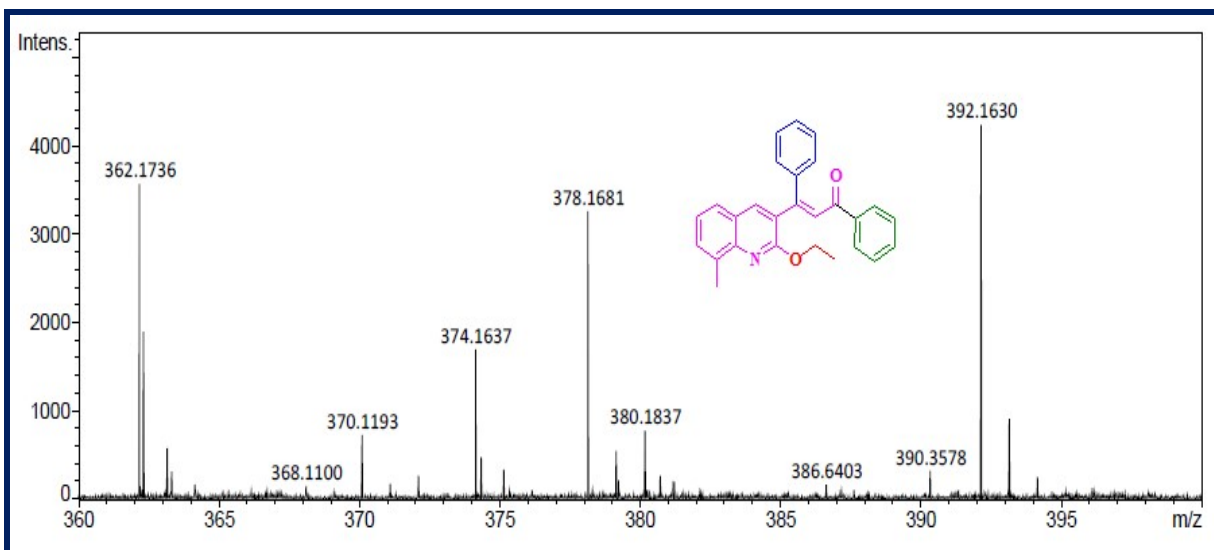

Fig. S42. Mass spectrum of A8

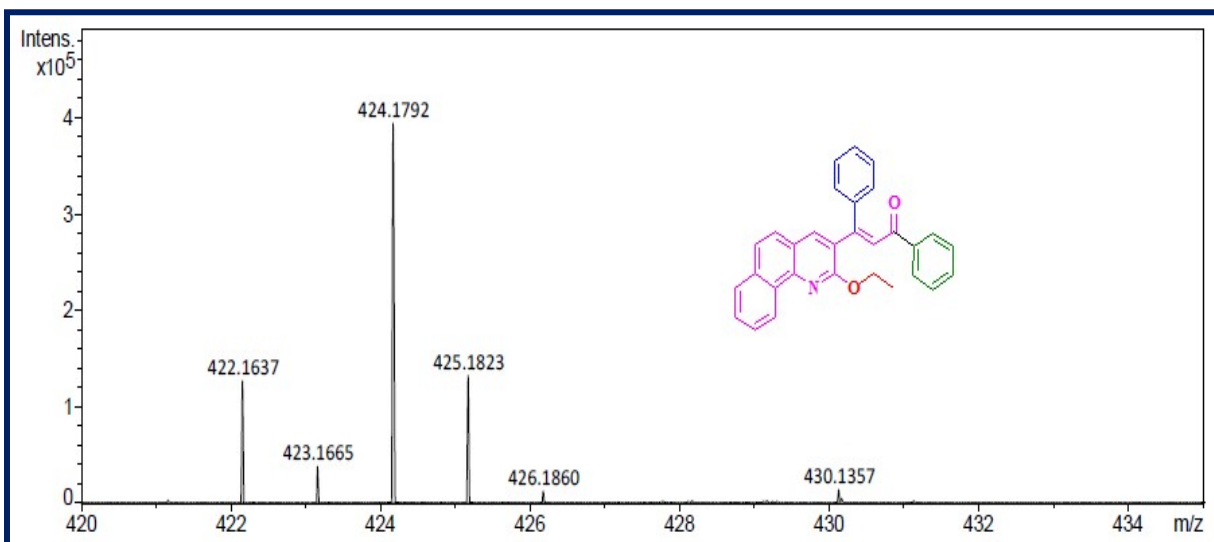

Fig. S43. Mass spectrum of A9

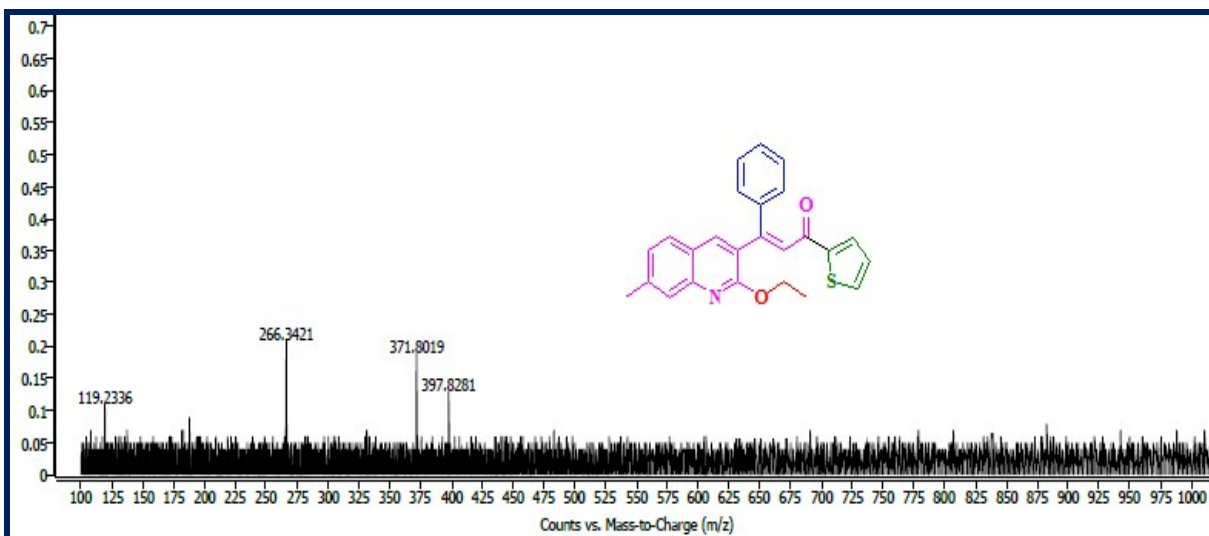

Fig. S44. Mass spectrum of A12

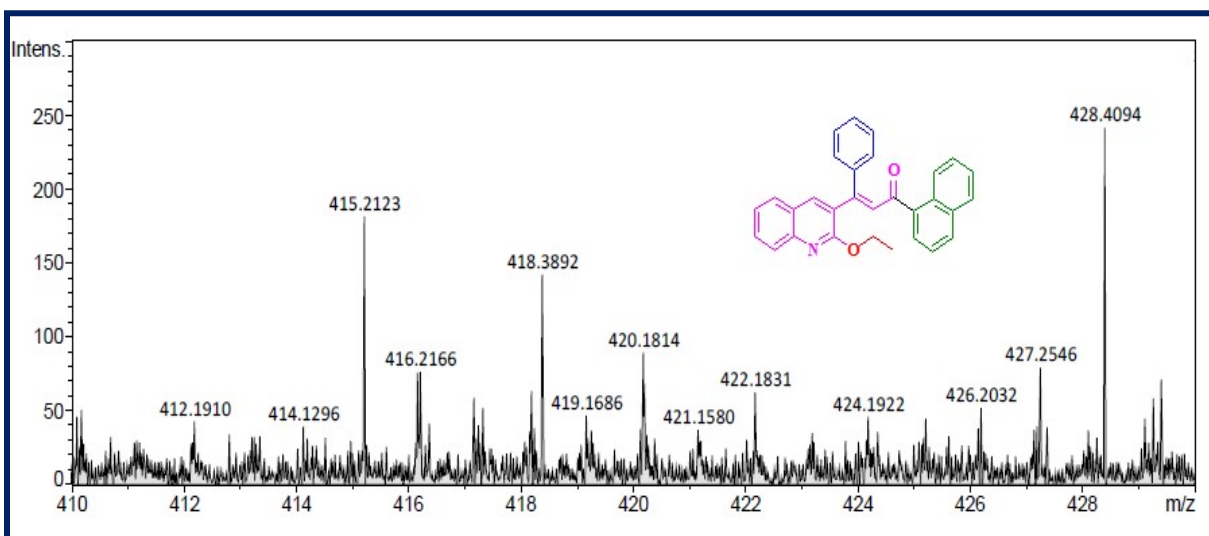

Fig. S45. Mass spectrum of A14

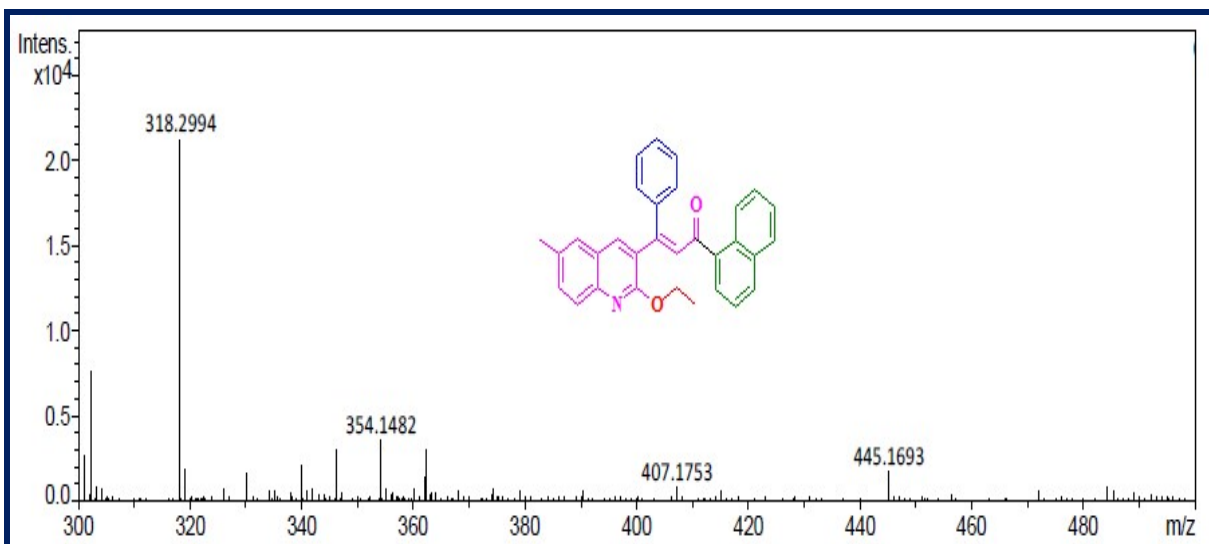

**Fig. S46.** Mass spectrum of A15

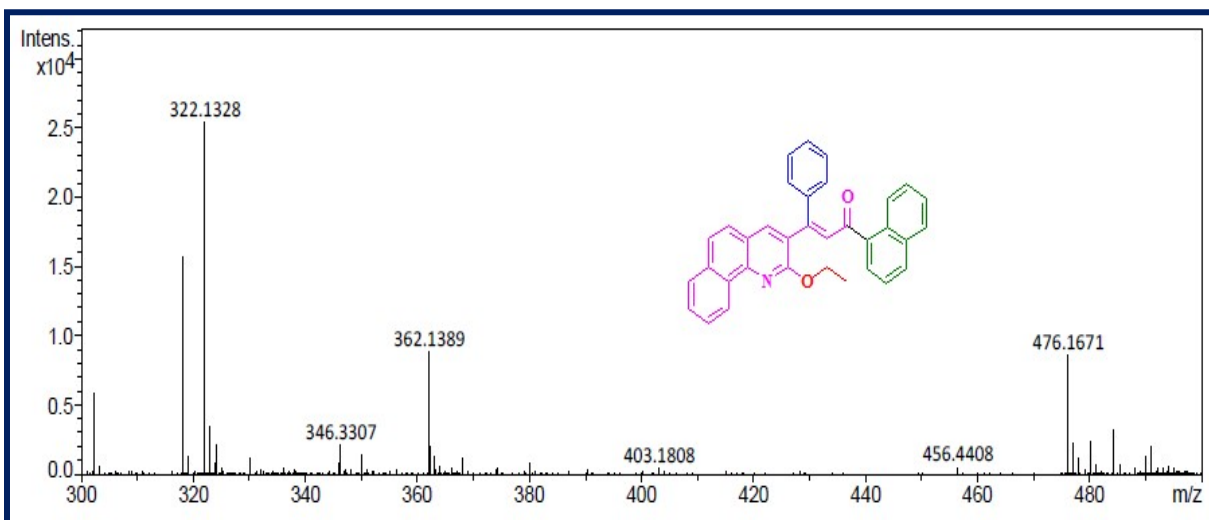

**Fig. S47.** Mass spectrum of A16

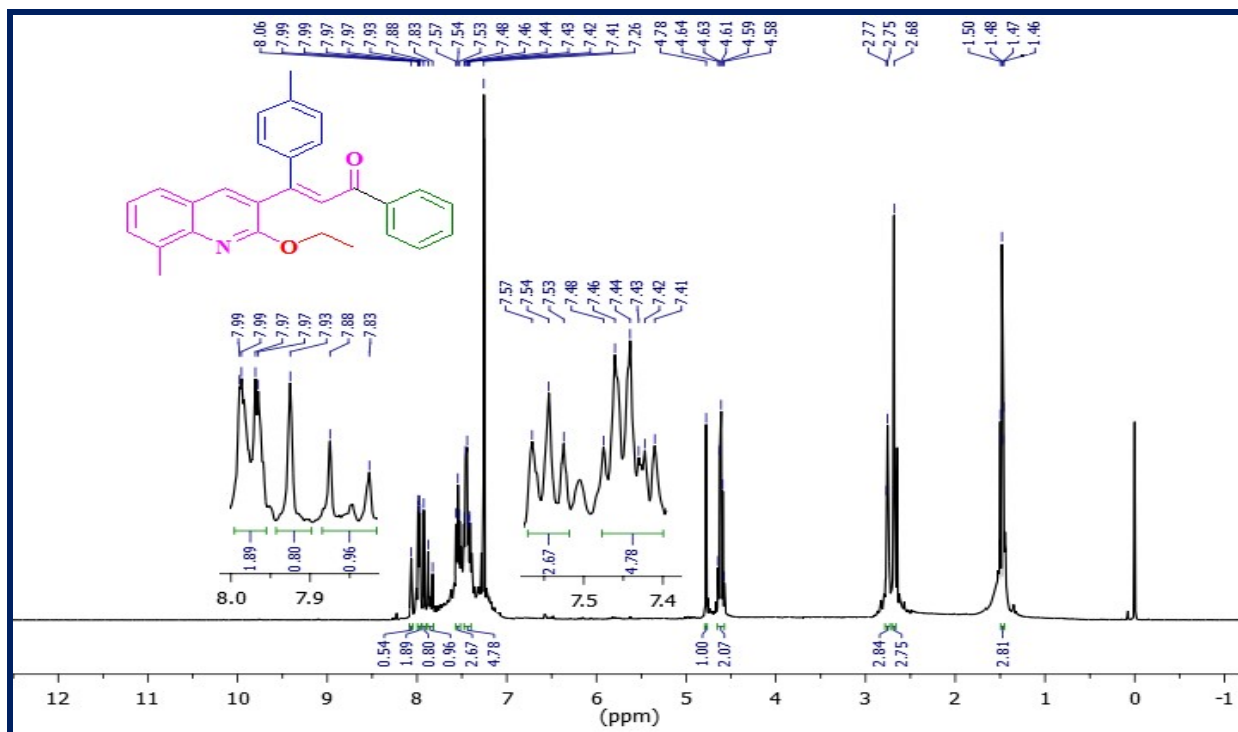

Fig. S48. <sup>1</sup>H NMR spectrum of A17

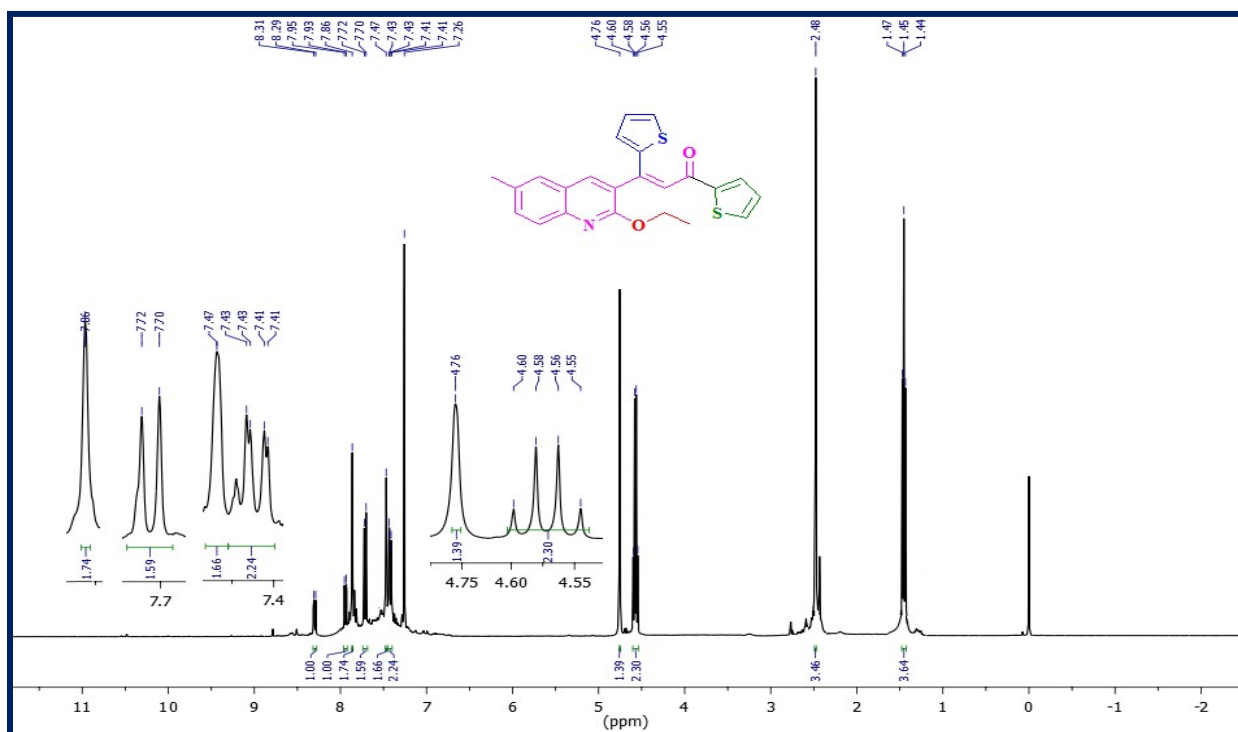

Fig. S49. <sup>1</sup>H NMR spectrum of A18

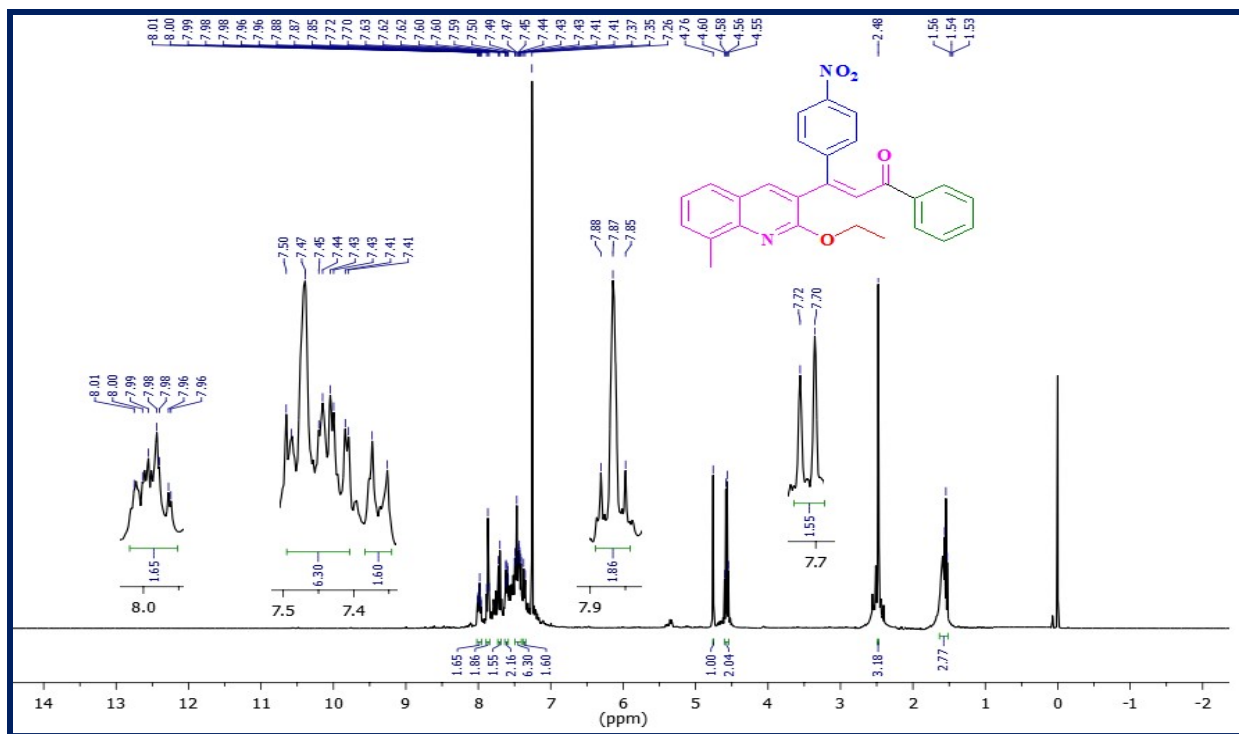

Fig. S50.  $^1\text{H}$  NMR spectrum of A19

Table S1. EPR spectral data of the complexes

| Complex | $g_{\parallel}$ | $g_{\perp}$ | $g_{av}$ |
|---------|-----------------|-------------|----------|
| 6A      | 2.644           | 2.131       | 2.302    |
| 6B      | 2.181           | 1.996       | 2.057    |

$$g_{av} = (g_{\parallel} + 2g_{\perp}) / 3$$

**Table S2.** Hydrogen bonds for the ligand **HL<sup>2</sup>** and the Ru(III) complexes **RuL<sup>1</sup>** and **RuL<sup>2</sup>** [Å and °]

| D–H···A                                                                                                                                            | d(D–H) | d(H···A) | d(D···A) | <(DHA) |
|----------------------------------------------------------------------------------------------------------------------------------------------------|--------|----------|----------|--------|
| <b>HL<sup>2</sup></b>                                                                                                                              |        |          |          |        |
| N(3)-H(3)...O(1)                                                                                                                                   | 0.879  | 1.888    | 2.623    | 139.90 |
| O(2)-H(23)...O(1)                                                                                                                                  | 0.805  | 1.857    | 2.657    | 172.11 |
| N(2)- H(21)...O(2)                                                                                                                                 | 0.858  | 2.017    | 2.817    | 154.71 |
| Symmetry operation: (x, y, z); (1/2-x,-y,1/2+z); (-x,1/2+y,1/2-z); (1/2+x,1/2-y,-z); (-x,-y,-z); (1/2+x,y,1/2-z); (x,1/2-y,1/2+z); (1/2-x,1/2+y,z) |        |          |          |        |
| <b>RuL<sup>1</sup></b>                                                                                                                             |        |          |          |        |
| N(3)-H(3)...O(1)                                                                                                                                   | 0.860  | 1.963    | 2.652    | 136.29 |
| O(2)-H(2)...O(1)                                                                                                                                   | 1.002  | 1.853    | 2.805    | 157.51 |
| Symmetry operation: (x, y, z); (-x,-y,-z)                                                                                                          |        |          |          |        |
| <b>RuL<sup>2</sup></b>                                                                                                                             |        |          |          |        |
| N(3)-H(3)...O(1)                                                                                                                                   | 0.880  | 2.001    | 2.680    | 132.98 |
| O(2)-H(2)...O(1)                                                                                                                                   | 0.921  | 1.818    | 2.708    | 161.79 |
| Symmetry operation: (x, y, z); (-x,-y,-z)                                                                                                          |        |          |          |        |

**Table S3.** Crystallographic data of the isolated ethoxy intermediate of **A12**

|                                                     | <b>A12</b> ethoxy intermediate                                      |
|-----------------------------------------------------|---------------------------------------------------------------------|
| Empirical formula                                   | C <sub>19</sub> H <sub>14</sub> NO <sub>2</sub> S                   |
| Formula weight                                      | 320.37                                                              |
| Temperature                                         | 296(2) K                                                            |
| Wavelength                                          | 0.71073 Å                                                           |
| Crystal system                                      | Triclinic                                                           |
| Space group                                         | P -1                                                                |
| Unit cell dimensions                                |                                                                     |
| a                                                   | 8.757(3) Å                                                          |
| b                                                   | 12.951(4) Å                                                         |
| c                                                   | 15.309(5) Å                                                         |
| α                                                   | 107.153(7) °                                                        |
| β                                                   | 94.363(7) °                                                         |
| γ                                                   | 94.516(7) °                                                         |
| Volume                                              | 1644.8(9)                                                           |
| Z                                                   | 4                                                                   |
| Density                                             | 1.294 Mg/m <sup>3</sup>                                             |
| Absorption coefficient                              | 0.205 mm <sup>-1</sup>                                              |
| <i>F</i> (000)                                      | 668                                                                 |
| θ range for data collection                         | 2.47 to 27.21 °                                                     |
| Limiting indices                                    | -11 ≤ <i>h</i> ≤ 11,<br>-16 ≤ <i>k</i> ≤ 16,<br>-19 ≤ <i>l</i> ≤ 19 |
| Reflections collected                               | 72175                                                               |
| Independent reflections                             | 7318 [R(int) = 0.4964]                                              |
| Absorption correction                               | Multi-scan                                                          |
| Refinement method                                   | Full-matrix least-squares on <i>F</i> <sup>2</sup>                  |
| Data/restraints/ parameters                         | 7318/0/419                                                          |
| Goodness-of-fit on <i>F</i> <sup>2</sup>            | 0.957                                                               |
| Final <i>R</i> indices [ <i>I</i> > 2σ( <i>I</i> )] | R1 = 0.1009, wR2 = 0.1901                                           |
| <i>R</i> indices (all data)                         | R1 = 0.3167, wR2 = 0.2581                                           |



## REFERENCES

- S1. A. I. Vogel, Textbook of Practical Organic Chemistry, 5<sup>th</sup> ed., Longman, London, 1989, 268.
- S2. T. Kobayashi, Y. Nishina, K. Shimizu and G. P. Sato, *Chem. Lett.*, 1988, 1137.
- S3. R. Prabhakaran and S. Dharani, Indian Patent No. 202241023805 Filed.
